# Supplementary material for: Identification and variation analysis of the composition and content of essential oil and fragrance compounds in Phoebe zhennan wood at different tree ages
Source: Front Plant Sci. 2024 Mar 26;15:1368894. doi: 10.3389/fpls.2024.1368894 (PMC11002133; doi:10.3389/fpls.2024.1368894)
Supplement: Supplementary file 2 [file Table_1.xlsx]

## Sheet: Table S1
Table S1. The metabolites and classification of essential oil in wood samples with three tree ages by LC-MS
ID	Name	Superclass	Class	Subclass
M203T419_2	Curcumene	Lipids and lipid-like molecules	Prenol lipids	Sesquiterpenoids
M357T616	Matairesinol	Lignans, neolignans and related compounds	Furanoid lignans	Tetrahydrofuran lignans
M194T286	Salsoline	Organoheterocyclic compounds	Tetrahydroisoquinolines	Others
M151T653	Carvone	Lipids and lipid-like molecules	Prenol lipids	Monoterpenoids
M193T744	Isojasmonic acid	Others	Others	Others
M153T497	Fenchone	Lipids and lipid-like molecules	Prenol lipids	Monoterpenoids
M270T525	Juvenile hormone III acid diol	Hydrocarbon derivatives	Carboxylic acids and derivatives	Alcohols and polyols
M267T688	Juvenile hormone III diol	Others	Others	Others
M156T243	6-Amino-5-oxocyclohex-2-ene-1-carboxylate	Others	Others	Others
M179T771	(-)-Bornyl acetate	Others	Others	Others
M169T461	1-Hydroxy-2-oxolimonene	Others	Others	Others
M389T538	(1'S,5'R)-5'-Hydroxyaverantin	Others	Others	Others
M146T109_2	2,5-Diaminohexanoate	Others	Others	Others
M174T103	Carboxymethylproline	Others	Others	Others
M178T93	2-Amino-4,5,6-trihydroxyhex-2-enoate	Others	Others	Others
M147T527	3,5-Diaminohexanoate	Organic acids and derivatives	Carboxylic acids and derivatives	Amino acids, peptides, and analogues
M335T708	(5Z,9E,14Z)-(8xi,11R,12S)-11,12-epoxy-8-hydroxyicosa-5,9,14-trienoic Acid	Lipids and lipid-like molecules	Fatty Acyls	Eicosanoids
M281T843	(6Z)-Octadecenoic acid	Others	Others	Others
M149T297	3-(4-Hydroxyphenyl)-2-propenal	Phenylpropanoids and polyketides	Cinnamaldehydes	Others
M103T818	3-Hydroxybutyric acid	Organic acids and derivatives	Hydroxy acids and derivatives	Beta hydroxy acids and derivatives
M128T281	5,6-Dihydrothymine	Others	Others	Others
M136T920	Amphetamine	Benzenoids	Benzene and substituted derivatives	Phenethylamines
M153T574	mandelic Acid	Benzenoids	Benzene and substituted derivatives	Others
M132T924	Pantolactone	Others	Others	Others
M180T228	Salsolinol	Organoheterocyclic compounds	Tetrahydroisoquinolines	Others
M285T556	Coclaurine	Others	Others	Others
M123T75	1-Phenylethanol	Others	Others	Others
M128T897	2-Propylpiperidine	Alkaloids and derivatives	Others	Others
M146T258	5-Amino-3-oxohexanoate	Organic acids and derivatives	Keto acids and derivatives	Medium-chain keto acids and derivatives
M265T422	Abscisic acid	Lipids and lipid-like molecules	Prenol lipids	Sesquiterpenoids
M129T362	Piperidine-2-carboxamide	Others	Others	Others
M125T78	1,2,3-Trihydroxybenzene	Benzenoids	Benzene and substituted derivatives	Phenols and derivatives
M153T342	1,2-Epoxy-p-menth-8-ene	Organoheterocyclic compounds	Oxepanes	Others
M109T105	1,3-Benzenediol	Benzenoids	Benzene and substituted derivatives	Phenols and derivatives
M185T699	1,4-Dimethyl-7-ethylazulene	Lipids and lipid-like molecules	Prenol lipids	Sesquiterpenoids
M279T752	10-Deoxymethynolide	Others	Others	Others
M171T702	10-Hydroxydecanoic acid	Others	Others	Others
M321T733	11(R)-HETE	Hydrocarbon derivatives	Carboxylic acids and derivatives	Alcohols and polyols
M301T715	11alpha,17beta-Dihydroxy-17-methylandrost-4-en-3-one	Others	Others	Others
M304T418	11alpha,17beta-Dihydroxyandrost-4-en-3-one	Others	Others	Others
M316T570	11beta,17beta-Dihydroxy-17alpha-methylandrosta-1,4-dien-3-one	Hydrocarbon derivatives	Organic oxides	Alcohols and polyols
M302T589	11b-Hydroxyandrost-4-ene-3,17-dione	Lipids and lipid-like molecules	Steroids and steroid derivatives	Androstane steroids
M325T816	11-Dehydrocorticosterone	Lipids and lipid-like molecules	Steroids and steroid derivatives	Hydroxysteroids
M483T680	11-Deoxocucurbitacin I	Hydrocarbon derivatives	Organic oxides	14-alpha-methylsteroids
M303T535	12(S)-HETE	Hydrocarbon derivatives	Carboxylic acids and derivatives	Alcohols and polyols
M215T934	12-Hydroxydodecanoic acid	Organic acids and derivatives	Hydroxy acids and derivatives	Medium-chain hydroxy acids and derivatives
M336T878	12-Keto-tetrahydro-leukotriene B4	Lipids and lipid-like molecules	Fatty Acyls	Eicosanoids
M311T599	13(S)-HpOTrE	Others	Others	Others
M295T737	13-L-Hydroperoxylinoleic acid	Lipids and lipid-like molecules	Fatty Acyls	Lineolic acids and derivatives
M271T757	16-Hydroxy hexadecanoic acid	Lipids and lipid-like molecules	Fatty Acyls	Fatty acids and conjugates
M363T746	18-Hydroxycorticosterone	Lipids and lipid-like molecules	Steroids and steroid derivatives	Hydroxysteroids
M302T640	19-Hydroxyandrost-4-ene-3,17-dione	Hydrocarbon derivatives	Organic oxides	Alcohols and polyols
M300T483	19-Oxoandrost-4-ene-3,17-dione	Hydrocarbon derivatives	Organic oxides	Androstane steroids
M302T522	19-Oxotestosterone	Hydrocarbon derivatives	Organic oxides	Alcohols and polyols
M243T308	1-Hexadecanol	Lipids and lipid-like molecules	Fatty Acyls	Fatty alcohols
M503T102	1-Kestose	Organic oxygen compounds	Organooxygen compounds	Carbohydrates and carbohydrate conjugates
M282T774	1-Methyladenosine	Nucleosides, nucleotides, and analogues	Purine nucleosides	Others
M169T536	1-Methylhistidine	Organic acids and derivatives	Carboxylic acids and derivatives	Amino acids, peptides, and analogues
M145T285	1-Naphthol	Benzenoids	Naphthalenes	Naphthols and derivatives
M124T933	1-Naphthylamine	Others	Others	Others
M152T135	2-(Methylamino)benzoic acid	Benzenoids	Benzene and substituted derivatives	Benzoic acids and derivatives
M155T411	2,3-Butanediol	Organic oxygen compounds	Organooxygen compounds	Alcohols and polyols
M309T700	2,3-Dinor-8-iso prostaglandin F2alpha	Others	Others	Others
M153T949	2',4'-Dihydroxyacetophenone	Benzenoids	Benzene and substituted derivatives	Acetophenones
M183T396	2,4-Dinitrophenol	Others	Textile Chemicals/Auxiliary/Dyes; Pesticides/Herbicides; Industrial Chemicals; Endogenous Metabolites	Others
M149T383	2,6-Diethylaniline	Benzenoids	Benzene and substituted derivatives	Anilines
M181T371	2',6'-Dihydroxy-4'-methoxyacetophenone	Organic oxygen compounds	Organooxygen compounds	Carbonyl compounds
M155T340	2,6-Dimethoxyphenol	Benzenoids	Phenols	Methoxyphenols
M157T592	2,6-Dimethyl-naphtalene	Benzenoids	Naphthalenes	Others
M347T577	21-Deoxycortisol	Lipids and lipid-like molecules	Steroids and steroid derivatives	Pregnane steroids
M401T465	25-Hydroxycholesterol	Lipids and lipid-like molecules	Steroids and steroid derivatives	Cholestane steroids
M195T559	2-Amino-2-deoxy-D-gluconate	Others	Others	Others
M137T169	2-Aminobenzoic acid	Benzenoids	Benzene and substituted derivatives	Benzoic acids and derivatives
M111T79	2-Furoate	Organoheterocyclic compounds	Furans	Furoic acid and derivatives
M113T92	2-Heptanone	Organic oxygen compounds	Organooxygen compounds	Carbonyl compounds
M183T266	2-Hydroxy-3-(4-hydroxyphenyl)propanoic acid	Others	Others	Others
M251T93	2-Hydroxy-6-oxo-6-(2-hydroxyphenoxy)-hexa-2,4-dienoate	Benzenoids	Benzene and substituted derivatives	1-hydroxy-2-unsubstituted benzenoids
M151T348	2-Hydroxyphenylacetate	Benzenoids	Benzene and substituted derivatives	Phenylacetic acids
M188T252	2-Keto-6-acetamidocaproate	Organic acids and derivatives	Keto acids and derivatives	Medium-chain keto acids and derivatives
M101T95	2-Ketobutyric acid	Organic acids and derivatives	Keto acids and derivatives	Short-chain keto acids and derivatives
M131T260	2-Ketohexanoic acid	Organic acids and derivatives	Keto acids and derivatives	Medium-chain keto acids and derivatives
M151T285	2-Methoxy-4-vinylphenol	Benzenoids	Phenols	Methoxyphenols
M149T238	2-Oxo-4-methylthiobutanoic acid	Lipids and lipid-like molecules	Fatty Acyls	Fatty acids and conjugates
M173T257	2-Oxoarginine	Organic acids and derivatives	Keto acids and derivatives	Short-chain keto acids and derivatives
M105T636	2-Phenylethanol	Benzenoids	Benzene and substituted derivatives	Others
M165T627	2-Phenylethyl acetate	Benzenoids	Benzene and substituted derivatives	Others
M153T371	2-Pyrocatechuic acid	Benzenoids	Benzene and substituted derivatives	Benzoic acids and derivatives
M221T451	2-trans,6-trans-Farnesal	Lipids and lipid-like molecules	Prenol lipids	Sesquiterpenoids
M167T766	3-(2-Hydroxyphenyl)propanoic acid	Phenylpropanoids and polyketides	Phenylpropanoic acids	Others
M209T240	3-(3,4-Dihydroxy-5-methoxy)-2-propenoic acid	Phenylpropanoids and polyketides	Cinnamic acids and derivatives	Hydroxycinnamic acids and derivatives
M169T410	3,4-Dihydroxybenzeneacetic acid	Benzenoids	Benzene and substituted derivatives	1-hydroxy-2-unsubstituted benzenoids
M185T36	3,4-Dihydroxymandelic acid	Others	Others	Others
M169T339	3,4-Dihydroxyphenylglycol	Benzenoids	Phenols	Benzenediols
M165T231	3,4-Dihydroxyphenylpropanoate	Phenylpropanoids and polyketides	Phenylpropanoic acids	Others
M194T270	3,4-Methylenedioxyamphetamine	Organoheterocyclic compounds	Benzodioxoles	Others
M154T262	3-Amino-4-hydroxybenzoate	Others	Others	Others
M161T536	3D-3,5_4-Trihydroxycyclohexane-1,2-dione	Others	Others	Others
M172T36	3-Dehydroshikimate	Others	Others	Others
M165T267	3-Formylsalicylic acid	Benzenoids	Benzene and substituted derivatives	1-hydroxy-4-unsubstituted benzenoids
M389T766	3-Geranylgeranylindole	Others	Others	Others
M152T275	3-Hydroxyanthranilic acid	Benzenoids	Benzene and substituted derivatives	Benzoic acids and derivatives
M145T938	3-Hydroxymethylglutaric acid	Lipids and lipid-like molecules	Fatty Acyls	Fatty acids and conjugates
M140T254	3-Hydroxypicolinic acid	Organoheterocyclic compounds	Pyridines and derivatives	Pyridinecarboxylic acids and derivatives
M150T363	3-Methyladenine	Organoheterocyclic compounds	Imidazopyrimidines	Purines and purine derivatives
M132T699	3-Methylindole	Organoheterocyclic compounds	Indoles and derivatives	Indoles
M196T382	3-Methyl-L-tyrosine	Others	Others	Others
M166T245	3-Methylxanthine	Organoheterocyclic compounds	Imidazopyrimidines	Purines and purine derivatives
M163T547	3-tert-Butyl-5-methylcatechol	Others	Others	Others
M149T294	3-tert-Butylphenol	Others	Industrial Chemicals	Others
M159T953	4,5-Dihydroorotic acid	Organic acids and derivatives	Carboxylic acids and derivatives	Amino acids, peptides, and analogues
M161T504	4-Acetamido-2-aminobutanoic acid	Hydrocarbon derivatives	Carboxylic acids and derivatives	Amines
M129T85	4-Acetylbutyrate	Lipids and lipid-like molecules	Fatty Acyls	Fatty acids and conjugates
M110T150	4-Aminophenol	Benzenoids	Benzene and substituted derivatives	Aniline and substituted anilines
M201T130	4-Fumarylacetoacetate	Others	Others	Others
M146T109_1	4-Guanidinobutanoic acid	Organic acids and derivatives	Carboxylic acids and derivatives	Amino acids, peptides, and analogues
M205T460	4-Hydroxy-3-(3-methyl-2-butenyl)acetophenone	Organic oxygen compounds	Organooxygen compounds	Carbonyl compounds
M163T255	4-Hydroxycinnamic acid	Phenylpropanoids and polyketides	Cinnamic acids and derivatives	Hydroxycinnamic acids and derivatives
M136T240	4-Hydroxyphenylacetaldehyde	Benzenoids	Benzene and substituted derivatives	Phenylacetaldehydes
M181T276	4-Hydroxyphthalate	Benzenoids	Benzene and substituted derivatives	1-hydroxy-2-unsubstituted benzenoids
M121T799_1	4-Hydroxystyrene	Benzenoids	Benzene and substituted derivatives	Styrenes
M123T677	4-Methylbenzyl alcohol	Benzenoids	Benzene and substituted derivatives	Benzyl alcohols
M125T600	4-Methylcatechol	Benzenoids	Phenols	Benzenediols
M138T537	4-Nitrophenol	Benzenoids	Phenols	Nitrophenols
M165T483	4-Phenylbutyrate	Benzenoids	Benzene and substituted derivatives	Others
M182T284	4-Pyridoxic acid	Organoheterocyclic compounds	Pyridines and derivatives	Pyridinecarboxylic acids and derivatives
M156T948	4-Quinolinecarboxylic acid	Others	Others	Others
M143T942	5-(2-Hydroxyethyl)-4-methylthiazole	Organoheterocyclic compounds	Azoles	Thiazoles
M177T273	5-(N-Methyl-4,5-dihydro-1H-pyrrol-2-yl)pyridin-2-ol	Others	Others	Others
M160T263	5-Acetamidovalerate	Lipids and lipid-like molecules	Fatty Acyls	Fatty acids and conjugates
M117T892_1	5-Aminopentanoic acid	Organic acids and derivatives	Carboxylic acids and derivatives	Amino acids, peptides, and analogues
M316T577	5a-Pregnane-3,20-dione	Lipids and lipid-like molecules	Steroids and steroid derivatives	Pregnane steroids
M211T127	5-Carboxyvanillic acid	Benzenoids	Benzene and substituted derivatives	Anisoles
M252T295	5'-Deoxyadenosine	Nucleosides, nucleotides, and analogues	5'-deoxyribonucleosides	Others
M179T692_1	5-Deoxy-D-glucuronate	Others	Others	Others
M187T295	5-Guanidino-3-methyl-2-oxopentanoate	Others	Others	Others
M177T386	5-Hydroxyconiferaldehyde	Benzenoids	Benzene and substituted derivatives	1-hydroxy-2-unsubstituted benzenoids
M191T681	5-Hydroxyindoleacetic acid	Organoheterocyclic compounds	Indoles and derivatives	Indolyl carboxylic acids and derivatives
M127T981	5-Hydroxymethyl-2-furancarboxaldehyde	Organooxygen compounds	Carbonyl compounds	Aldehydes
M206T357	5-Methoxyindoleacetate	Organoheterocyclic compounds	Indoles and derivatives	Indolyl carboxylic acids and derivatives
M297T841	5'-Methylthioadenosine	Nucleosides, nucleotides, and analogues	5'-deoxyribonucleosides	5'-deoxy-5'-thionucleosides
M183T333	5-Oxo-1,2-campholide	Others	Others	Others
M221T98	6-Acetyl-D-glucose	Hydrocarbon derivatives	Carboxylic acids and derivatives	Alcohols and polyols
M304T563	6beta-Hydroxytestosterone	Lipids and lipid-like molecules	Steroids and steroid derivatives	Androstane steroids
M138T927_2	6-Hydroxynicotinic acid	Organoheterocyclic compounds	Pyridines and derivatives	Pyridinecarboxylic acids and derivatives
M209T446	6-Methoxymellein	Organoheterocyclic compounds	Benzopyrans	2-benzopyrans
M149T845	6-Methylmercaptopurine	Organoheterocyclic compounds	Imidazopyrimidines	Purines and purine derivatives
M275T79	6-Phosphogluconic acid	Hydrocarbon derivatives	Carboxylic acids and derivatives	Alcohols and polyols
M189T416	7,8-Diaminononanoate	Others	Others	Others
M166T178	7-Methylguanine	Organoheterocyclic compounds	Imidazopyrimidines	Purines and purine derivatives
M337T698	8,9-DiHETrE	Lipids and lipid-like molecules	Fatty Acyls	Eicosanoids
M170T412	8-Amino-7-oxononanoate	Others	Others	Others
M303T646	8-HETE	Lipids and lipid-like molecules	Fatty Acyls	Eicosanoids
M311T708	9(S)-HPODE	Lipids and lipid-like molecules	Fatty Acyls	Lineolic acids and derivatives
M295T772	9,10-Epoxyoctadecenoic acid	Lipids and lipid-like molecules	Fatty Acyls	Fatty acids and conjugates
M329T562	9,12,13-TriHOME	Hydrocarbon derivatives	Carboxylic acids and derivatives	Alcohols and polyols
M286T684	9-cis-Retinol	Others	Others	Others
M294T599	9-OxoODE	Lipids and lipid-like molecules	Fatty Acyls	Lineolic acids and derivatives
M251T537	Abscisic alcohol	Others	Others	Others
M249T880	Abscisic aldehyde	Others	Others	Others
M195T267	Acetosyringone	Others	Others	Others
M181T92	Acetylcholine chloride	Others	Others	Others
M163T108	Acetylcysteine	Organic acids and derivatives	Carboxylic acids and derivatives	Amino acids, peptides, and analogues
M140T750	Acetylphosphate	Organic acids and derivatives	Organic phosphoric acids and derivatives	Phosphate esters
M134T250	Adenine	Organoheterocyclic compounds	Imidazopyrimidines	Purines and purine derivatives
M268T240	Adenosine	Nucleosides, nucleotides, and analogues	Purine nucleosides	Others
M129T712	Adipate semialdehyde	Hydrocarbon derivatives	Carboxylic acids and derivatives	Carbonyl compounds
M127T85	Adipic acid	Lipids and lipid-like molecules	Fatty Acyls	Fatty acids and conjugates
M331T818	Adrenic acid	Lipids and lipid-like molecules	Fatty Acyls	Fatty acids and conjugates
M300T678	Adrenosterone	Hydrocarbon derivatives	Organic oxides	Androstane steroids
M233T749	Alantolactone	Lipids and lipid-like molecules	Prenol lipids	Sesquiterpenoids
M299T824	all-trans-Retinoic acid	Lipids and lipid-like molecules	Prenol lipids	Retinoids
M205T520	Cadinene	Lipids and lipid-like molecules	Prenol lipids	Sesquiterpenoids
M205T809	Cedrene	Lipids and lipid-like molecules	Prenol lipids	Sesquiterpenoids
M295T817	dimorphecolic acid	Lipids and lipid-like molecules	Fatty Acyls	Lineolic acids and derivatives
M205T668	Humulene	Lipids and lipid-like molecules	Prenol lipids	Sesquiterpenoids
M115T109	Ketoisovaleric acid	Hydrocarbon derivatives	Carboxylic acids and derivatives	Alpha-keto acids and derivatives
M277T489	Linolenic acid	Lipids and lipid-like molecules	Fatty Acyls	Lineolic acids and derivatives
M149T439	Oxo-benzeneacetic acid	Benzenoids	Benzene and substituted derivatives	Benzoyl derivatives
M430T461	Tocopherol	Lipids and lipid-like molecules	Prenol lipids	Quinone and hydroquinone lipids
M162T126	Aminoadipic acid	Organic acids and derivatives	Carboxylic acids and derivatives	Amino acids, peptides, and analogues
M152T626	Aminosalicylic Acid	Benzenoids	Benzene and substituted derivatives	Benzoic acids and derivatives
M333T648	Andrographolide	Others	Endogenous Metabolites; Natural Products/Medicines	Others
M288T663	Androstanedione	Hydrocarbon derivatives	Organic oxides	Androstane steroids
M290T439	Androsterone	Lipids and lipid-like molecules	Steroids and steroid derivatives	Androstane steroids
M185T359	Antiarol	Others	Others	Others
M205T651	Apiole	Organoheterocyclic compounds	Benzodioxoles	Others
M311T817	Arachidic acid	Lipids and lipid-like molecules	Fatty Acyls	Fatty acids and conjugates
M287T829	Arachidonate	Lipids and lipid-like molecules	Fatty Acyls	Fatty acids and conjugates
M287T498	Aromadendrin	Benzenoids	Benzene and substituted derivatives	1-benzopyrans
M488T820	Asiatic acid	Others	Others	Others
M182T107	Azatyrosine	Others	Others	Others
M187T239	Azelaic acid	Lipids and lipid-like molecules	Fatty Acyls	Fatty acids and conjugates
M107T452	Benzaldehyde	Benzenoids	Benzene and substituted derivatives	Benzoyl derivatives
M118T722	Benzeneacetonitrile	Benzenoids	Benzene and substituted derivatives	Benzyl cyanides
M123T924	Benzoate	Others	Others	Others
M218T767	Alanyl-L-lysine	Organic acids and derivatives	Peptidomimetics	Hybrid peptides
M536T910	Carotene	Others	Others	Others
M204T814	Caryophyllene	Lipids and lipid-like molecules	Prenol lipids	Sesquiterpenoids
M205T840	Cubebene	Lipids and lipid-like molecules	Prenol lipids	Sesquiterpenoids
M118T94	Betaine	Organic acids and derivatives	Carboxylic acids and derivatives	Amino acids, peptides, and analogues
M532T819	Isorenieratene	Benzenoids	Aromatic hydrocarbons	Branched unsaturated hydrocarbons
M131T551	Leucine	Organic acids and derivatives	Carboxylic acids and derivatives	Amino acids, peptides, and analogues
M203T834	Santalol	Hydrocarbon derivatives	Fatty Acyls	Alcohols and polyols
M205T864	Selinene	Lipids and lipid-like molecules	Prenol lipids	Sesquiterpenoids
M163T688	Thujaplicin	Hydrocarbon derivatives	Tropones	Tropolones
M142T592	Betonicine	Organic acids and derivatives	Carboxylic acids and derivatives	Amino acids, peptides, and analogues
M284T627	Boldione	#N/A	Steroids and steroid derivatives	Androstane steroids
M204T272	Bufotenin	Organoheterocyclic compounds	Indoles and derivatives	Tryptamines and derivatives
M232T307	Butyryl-L-carnitine	Others	Others	Others
M179T641	Caffeate	Others	Others	Others
M147T253	Caffeic aldehyde	Benzenoids	Benzene and substituted derivatives	1-hydroxy-2-unsubstituted benzenoids
M314T508	Cannabidiol	Others	Others	Others
M115T820	Caproic acid	Lipids and lipid-like molecules	Fatty Acyls	Fatty acids and conjugates
M237T479	Capsidiol	Lipids and lipid-like molecules	Prenol lipids	Sesquiterpenoids
M226T922	Carnosine	Organic acids and derivatives	Peptidomimetics	Hybrid peptides
M203T799	Caryophyllene alpha-oxide	Lipids and lipid-like molecules	Prenol lipids	Sesquiterpenoids
M111T74	Catechol	Others	Others	Others
M325T96	Cellobiose	Others	Others	Others
M224T488	Cerulenin	Organoheterocyclic compounds	Epoxides	Oxirane carboxylic acids and derivatives
M135T567	Chavicol	Benzenoids	Phenols	1-hydroxy-2-unsubstituted benzenoids
M465T815	Cholesterol sulfate	Lipids and lipid-like molecules	Steroids and steroid derivatives	Cholestane steroids
M184T111	Choline sulfate	Others	Others	Others
M126T227	Ciliatine	Organic acids and derivatives	Organic phosphonic acids and derivatives	Organic phosphonic acids
M295T454	Cinchonidine	Alkaloids and derivatives	Cinchona alkaloids	Others
M263T92	Cinoxacin	Organoheterocyclic compounds	Diazanaphthalenes	Benzodiazines
M141T98	cis,cis-Muconate	Lipids and lipid-like molecules	Fatty Acyls	Fatty acids and conjugates
M132T91	cis-4-Hydroxy-L-proline	Others	Others	Others
M298T471	cis-9,10-Epoxystearic acid	Others	Others	Others
M155T246	cis-Aconitic acid	Hydrocarbon derivatives	Carboxylic acids and derivatives	Carbonyl compounds
M304T450	cis-Dihydroquercetin	Benzenoids	Benzene and substituted derivatives	1-benzopyrans
M325T451	Citalopram	Benzenoids	Benzene and substituted derivatives	Phenylbutylamines
M147T104	Citramalic acid	Lipids and lipid-like molecules	Fatty Acyls	Fatty acids and conjugates
M192T76	Citric acid	Organic acids and derivatives	Carboxylic acids and derivatives	Tricarboxylic acids and derivatives
M176T343	Citrulline	Organic acids and derivatives	Carboxylic acids and derivatives	Amino acids, peptides, and analogues
M235T694	Confertifolin	Others	Others	Others
M341T97	Coniferin	Organooxygen compounds	Carbohydrates and carbohydrate conjugates	Glycosyl compounds
M179T253	Coniferyl aldehyde	Others	Others	Others
M347T727	Corticosterone	Lipids and lipid-like molecules	Steroids and steroid derivatives	Hydroxysteroids
M232T705	Costunolide	Lipids and lipid-like molecules	Prenol lipids	Sesquiterpenoids
M114T36	Creatinine	Organic acids and derivatives	Carboxylic acids and derivatives	Amino acids, peptides, and analogues
M539T644	Cucurbitacin E	Others	Others	Others
M149T452	Cuminaldehyde	Lipids and lipid-like molecules	Prenol lipids	Monoterpenoids
M234T475	Curcumenol	Lipids and lipid-like molecules	Prenol lipids	Sesquiterpenoids
M266T479	Cyclizine	Benzenoids	Benzene and substituted derivatives	Diphenylmethanes
M222T625	Cycloeudesmol	Hydrocarbon derivatives	Organooxygen compounds	Alcohols and polyols
M264T331	Cycloheximide	Others	Others	Others
M100T767	Cyclohexylamine	Organic nitrogen compounds	Organonitrogen compounds	Cyclohexylamines
M280T512	Cyclopeptine	Others	Others	Others
M167T404	Cyromazine	Organoheterocyclic compounds	Triazines	Aminotriazines
M243T92	Cytidine	Others	Others	Others
M397T741	Daidzin	Phenylpropanoids and polyketides	Isoflavonoids	Isoflavonoid O-glycosides
M177T285	D-Alanyl-D-serine	Others	Others	Others
M153T95	D-Arabitol	Organic oxygen compounds	Organooxygen compounds	Carbohydrates and carbohydrate conjugates
M150T258	D-Cathinone	Others	Others	Others
M269T782	Dehydroepiandrosterone	Lipids and lipid-like molecules	Steroids and steroid derivatives	Androstane steroids
M250T591	Deoxyadenosine	Nucleosides, nucleotides, and analogues	Purine nucleosides	Purine 2'-deoxyribonucleosides
M393T735	Deoxycholic acid	Lipids and lipid-like molecules	Steroids and steroid derivatives	Bile acids, alcohols and derivatives
M227T718	Deoxycytidine	Nucleosides, nucleotides, and analogues	Pyrimidine nucleosides	Pyrimidine 2'-deoxyribonucleosides
M233T666	Deoxyinosine	Nucleosides, nucleotides, and analogues	Purine nucleosides	Purine 2'-deoxyribonucleosides
M135T95	Deoxyribose	Organic oxygen compounds	Organooxygen compounds	Carbohydrates and carbohydrate conjugates
M228T730	Deoxyuridine	Nucleosides, nucleotides, and analogues	Pyrimidine nucleosides	Pyrimidine 2'-deoxyribonucleosides
M167T266	Desaminotyrosine	Phenylpropanoids and polyketides	Phenylpropanoic acids	Others
M214T945	Dethiobiotin	Lipids and lipid-like molecules	Fatty Acyls	Fatty acids and conjugates
M181T946	D-Galactose	Others	Others	Others
M261T93	D-Glucose 1-phosphate	Organic oxygen compounds	Organooxygen compounds	Carbohydrates and carbohydrate conjugates
M211T94	D-Glycero-D-galacto-heptitol	Organic oxygen compounds	Organooxygen compounds	Carbohydrates and carbohydrate conjugates
M311T96	Dhurrin	Benzenoids	Benzene and substituted derivatives	1-hydroxy-2-unsubstituted benzenoids
M279T826	Dibutyl phthalate	Benzenoids	Benzene and substituted derivatives	Benzoic acids and derivatives
M153T190	Diethylphosphate	Organic acids and derivatives	Organic phosphoric acids and derivatives	Phosphate esters
M206T437	Diethylpropion	Organic oxygen compounds	Organooxygen compounds	Carbonyl compounds
M290T479	Dihydrotestosterone	Lipids and lipid-like molecules	Steroids and steroid derivatives	Androstane steroids
M128T95	Dihydrothymine	Organoheterocyclic compounds	Diazines	Pyrimidines and pyrimidine derivatives
M113T872	Dihydrouracil	Organoheterocyclic compounds	Diazines	Pyrimidines and pyrimidine derivatives
M279T942	Diisobutyl phthalate	Benzenoids	Benzene and substituted derivatives	Benzoic acids and derivatives
M205T826	Dillapiol	Benzenoids	Benzodioxoles	Anisoles
M151T923	D-Lyxose	Others	Others	Others
M213T623	Dodecanedioic acid	Lipids and lipid-like molecules	Fatty Acyls	Fatty acids and conjugates
M200T954	Dodecanoic acid	Lipids and lipid-like molecules	Fatty Acyls	Fatty acids and conjugates
M196T105	Dopaquinone	Organic acids and derivatives	Carboxylic acids and derivatives	Amino acids, peptides, and analogues
M165T740	D-Phenylalanine	Others	Others	Others
M163T93	D-Psicose	Others	Others	Others
M151T74	D-Ribose	Organic oxygen compounds	Organooxygen compounds	Carbohydrates and carbohydrate conjugates
M230T678	D-Ribose 5-phosphate	Organic oxygen compounds	Organooxygen compounds	Carbohydrates and carbohydrate conjugates
M151T257	D-Xylose	Organic oxygen compounds	Organooxygen compounds	Carbohydrates and carbohydrate conjugates
M143T102	Ectoine	Others	Others	Others
M349T879	Enalaprilat	Organic acids and derivatives	Carboxylic acids and derivatives	Amino acids, peptides, and analogues
M302T516	EPA (d5)	Lipids and lipid-like molecules	Fatty Acyls	Fatty acids and conjugates
M271T817	Epiandrosterone	Lipids and lipid-like molecules	Steroids and steroid derivatives	Androstane steroids
M289T361	Epicatechin	Phenylpropanoids and polyketides	Flavonoids	Flavans
M114T354	Epsilon-caprolactam	Organoheterocyclic compounds	Lactams	Caprolactams
M243T710	Equol	Phenylpropanoids and polyketides	Isoflavonoids	Isoflavans
M287T547	Eriodictyol	Phenylpropanoids and polyketides	Flavonoids	Flavans
M338T913	Erucic acid	Lipids and lipid-like molecules	Fatty Acyls	Fatty acids and conjugates
M123T96	Erythritol	Others	Others	Others
M272T509	Estradiol	Lipids and lipid-like molecules	Steroids and steroid derivatives	Estrane steroids
M149T593_1	Estragole	Benzenoids	Phenol ethers	Anisoles
M165T607_1	Ethionamide	Organoheterocyclic compounds	Pyridines and derivatives	Others
M101T936	Ethylmethylacetic acid	Lipids and lipid-like molecules	Fatty Acyls	Fatty acids and conjugates
M164T385	Etilefrine	Others	Therapeutics/Prescription Drugs; Sports Doping Drugs	Others
M288T576	Etiocholanedione	#N/A	Organic oxides	Androstane steroids
M147T646	Eugenol	Benzenoids	Phenols	Methoxyphenols
M297T617	Exemestane	Lipids and lipid-like molecules	Steroids and steroid derivatives	Androstane steroids
M236T449	Farnesoic acid	Others	Others	Others
M232T348	Fenfluramine	Others	Others	Others
M441T746	Folic acid	Organic acids and derivatives	Carboxylic acids and derivatives	Amino acids, peptides, and analogues
M340T815	Fructose 1,6-bisphosphate	Organic oxygen compounds	Organooxygen compounds	Carbohydrates and carbohydrate conjugates
M115T79	Fumaric acid	Organic acids and derivatives	Carboxylic acids and derivatives	Dicarboxylic acids and derivatives
M172T443	Gabapentin	Others	Others	Others
M253T104	Galactosylglycerol	Hydrocarbon derivatives	Glycerolipids	Alcohols and polyols
M104T89	Aminobutyric acid	Organic acids and derivatives	Carboxylic acids and derivatives	Amino acids, peptides, and analogues
M249T91	Glutamylcysteine	Organic acids and derivatives	Carboxylic acids and derivatives	Amino acids, peptides, and analogues
M137T987	terpinene	Hydrocarbons	Unsaturated hydrocarbons	Branched unsaturated hydrocarbons
M249T505	Gemfibrozil	Benzenoids	Phenol ethers	Others
M227T267	Genipin	Lipids and lipid-like molecules	Prenol lipids	Monoterpenoids
M269T731_1	Genistein	Phenylpropanoids and polyketides	Isoflavonoids	Isoflav-2-enes
M432T742	Genistin	Phenylpropanoids and polyketides	Isoflavonoids	Isoflavonoid O-glycosides
M432T382	Gentamicin C1a	Others	Others	Others
M137T404	Gentisate aldehyde	Organic oxygen compounds	Organooxygen compounds	Carbonyl compounds
M155T949	Gentisic acid	Benzenoids	Benzene and substituted derivatives	Benzoic acids and derivatives
M153T464_2	Geranial	Lipids and lipid-like molecules	Prenol lipids	Monoterpenoids
M169T510	Geranic acid	Lipids and lipid-like molecules	Prenol lipids	Monoterpenoids
M137T461	Geraniol	Lipids and lipid-like molecules	Prenol lipids	Monoterpenoids
M179T434	Geranyl acetate	Lipids and lipid-like molecules	Fatty Acyls	Fatty alcohol esters
M346T539	Gibberellin A3	Lipids and lipid-like molecules	Prenol lipids	Diterpenoids
M179T95	Gluconic acid	Organic oxygen compounds	Organooxygen compounds	Carbohydrates and carbohydrate conjugates
M132T99	Glutaric acid	Organic acids and derivatives	Carboxylic acids and derivatives	Dicarboxylic acids and derivatives
M105T87	Glyceric acid	Organic oxygen compounds	Organooxygen compounds	Carbohydrates and carbohydrate conjugates
M258T92	Glycerophosphocholine	Lipids and lipid-like molecules	Glycerophospholipids	Glycerophosphocholines
M471T841	Glycyrrhetinic acid	#N/A	Prenol lipids	Triterpenoids
M175T131	Guanidinosuccinic acid	Organic acids and derivatives	Carboxylic acids and derivatives	Amino acids, peptides, and analogues
M117T918_1	Guanidoacetic acid	Organic acids and derivatives	Carboxylic acids and derivatives	Amino acids, peptides, and analogues
M152T107_1	Guanine	Organoheterocyclic compounds	Imidazopyrimidines	Purines and purine derivatives
M282T249	Guanosine	Nucleosides, nucleotides, and analogues	Purine nucleosides	Others
M197T478	Gulonic acid	Organic acids and derivatives	Hydroxy acids and derivatives	Medium-chain hydroxy acids and derivatives
M182T301	Harman	Alkaloids and derivatives	Harmala alkaloids	Others
M130T91	Heptanoic acid	Lipids and lipid-like molecules	Fatty Acyls	Fatty acids and conjugates
M223T697	Hinesol	Others	Others	Others
M180T329	Hippuric acid	Benzenoids	Benzene and substituted derivatives	Benzoic acids and derivatives
M276T592	Homatropine	Others	Others	Others
M261T539	Homobaldrinal	Hydrocarbon derivatives	Carboxylic acids and derivatives	Carbonyl compounds
M190T105	Homocitrulline	Organic acids and derivatives	Carboxylic acids and derivatives	Amino acids, peptides, and analogues
M183T463	Homovanillic acid	Benzenoids	Phenols	Methoxyphenols
M166T270	Hordenine	Benzenoids	Benzene and substituted derivatives	Phenethylamines
M110T948	Hydroquinone	Benzenoids	Phenols	Benzenediols
M224T316	Hydroxykynurenine	Organic oxygen compounds	Organooxygen compounds	Carbonyl compounds
M108T184	Hydroxylaminobenzene	Benzenoids	1-hydroxylamino, 2-unsubstituted benzenoids	Arylhydroxamates
M135T179	Hypoxanthine	Organoheterocyclic compounds	Imidazopyrimidines	Purines and purine derivatives
M205T672_2	Ibuprofen	Phenylpropanoids and polyketides	Phenylpropanoic acids	Others
M249T722	Illudin M	Others	Others	Others
M154T921	Imidazol-5-yl-pyruvate	Hydrocarbon derivatives	Azacyclic compounds	Alpha-keto acids and derivatives
M173T562	Iminoarginine	Others	Others	Others
M118T539	Indole	Organoheterocyclic compounds	Indoles and derivatives	Indoles
M161T934	Indole-3-carboxylic acid	Organoheterocyclic compounds	Indoles and derivatives	Indolecarboxylic acids and derivatives
M197T554	Indoleacetic acid	Organoheterocyclic compounds	Indoles and derivatives	Indolyl carboxylic acids and derivatives
M204T363	Indolebutyric acid	Organoheterocyclic compounds	Indoles and derivatives	Indoles
M206T298	Indolelactic acid	Organoheterocyclic compounds	Indoles and derivatives	Indolyl carboxylic acids and derivatives
M202T806	Indolepyruvate	Organoheterocyclic compounds	Indoles and derivatives	Indolyl carboxylic acids and derivatives
M233T759	Isoalantolactone	Lipids and lipid-like molecules	Prenol lipids	Sesquiterpenoids
M134T144	Isochavicol	Others	Others	Others
M191T77	Isocitric acid	Organic acids and derivatives	Carboxylic acids and derivatives	Tricarboxylic acids and derivatives
M209T686	Isoelemicin	Benzenoids	Phenol ethers	Anisoles
M163T480	Isoeugenol	Benzenoids	Phenols	Methoxyphenols
M139T630	Isophorone	Organooxygen compounds	Carbonyl compounds	Ketones
M179T472	Isopropylparaben	Others	Extractables/Leachables	Others
M301T679	Isotretinoin	Others	Therapeutics/Prescription Drugs; Endogenous Metabolites	Others
M102T360	Isovaleric acid	Lipids and lipid-like molecules	Fatty Acyls	Fatty acids and conjugates
M129T102	Itaconic acid	Lipids and lipid-like molecules	Fatty Acyls	Fatty acids and conjugates
M165T675	Jasmone	Organic oxygen compounds	Organooxygen compounds	Carbonyl compounds
M193T819	Jasmonic acid	Lipids and lipid-like molecules	Fatty Acyls	Lineolic acids and derivatives
M249T582	Juvenile hormone III	Others	Others	Others
M299T630	Kaempferide	Phenylpropanoids and polyketides	Flavonoids	O-methylated flavonoids
M131T946	Ketoleucine	Organic acids and derivatives	Keto acids and derivatives	Short-chain keto acids and derivatives
M190T260	Kynurenic acid	Organoheterocyclic compounds	Quinolines and derivatives	Quinoline carboxylic acids
M118T843	L-2,4-diaminobutyric acid	Organic acids and derivatives	Carboxylic acids and derivatives	Amino acids, peptides, and analogues
M168T267	L-4-Hydroxyphenylglycine	Others	Others	Others
M175T85	L-Arginine	Organic acids and derivatives	Carboxylic acids and derivatives	Amino acids, peptides, and analogues
M133T88	L-Asparagine	Organic acids and derivatives	Carboxylic acids and derivatives	Amino acids, peptides, and analogues
M132T85	L-Aspartic acid	Organic acids and derivatives	Carboxylic acids and derivatives	Amino acids, peptides, and analogues
M369T911	Lathosterol	Lipids and lipid-like molecules	Steroids and steroid derivatives	Cholestane steroids
M162T93	L-Carnitine	Organic nitrogen compounds	Organonitrogen compounds	Quaternary ammonium salts
M121T75	L-Cysteine	Organic acids and derivatives	Carboxylic acids and derivatives	Amino acids, peptides, and analogues
M166T201	Levonordefrin	Benzenoids	Benzene and substituted derivatives	Phenylpropanes
M312T744	Levonorgestrel	Lipids and lipid-like molecules	Steroids and steroid derivatives	Estrane steroids
M148T93_1	L-Glutamic acid	Organic acids and derivatives	Carboxylic acids and derivatives	Amino acids, peptides, and analogues
M145T93	L-Glutamine	Organic acids and derivatives	Carboxylic acids and derivatives	Amino acids, peptides, and analogues
M154T102	L-Histidine	Organic acids and derivatives	Carboxylic acids and derivatives	Amino acids, peptides, and analogues
M181T479	L-Histidine trimethylbetaine	Hydrocarbon derivatives	Azacyclic compounds	Amines
M141T428	L-Histidinol	Organic nitrogen compounds	Organonitrogen compounds	Amines
M118T876	L-Homoserine	Organic acids and derivatives	Carboxylic acids and derivatives	Amino acids, peptides, and analogues
M171T541	Limonene-1,2-diol	Others	Others	Others
M280T866	Linoleic acid	Lipids and lipid-like molecules	Fatty Acyls	Lineolic acids and derivatives
M132T230	L-Isoleucine	Organic acids and derivatives	Carboxylic acids and derivatives	Amino acids, peptides, and analogues
M209T107	L-Kynurenine	Organic oxygen compounds	Organooxygen compounds	Carbonyl compounds
M147T93	L-Lysine	Organic acids and derivatives	Carboxylic acids and derivatives	Amino acids, peptides, and analogues
M134T79	L-Malic acid	Organic acids and derivatives	Hydroxy acids and derivatives	Beta hydroxy acids and derivatives
M164T270	L-Phenylalanine	Organic acids and derivatives	Carboxylic acids and derivatives	Amino acids, peptides, and analogues
M116T100	L-Proline	Organic acids and derivatives	Carboxylic acids and derivatives	Amino acids, peptides, and analogues
M129T78	L-threo-3-Methylmalate	Hydrocarbon derivatives	Carboxylic acids and derivatives	Alcohols and polyols
M204T529_1	L-Tryptophan	Organoheterocyclic compounds	Indoles and derivatives	Indolyl carboxylic acids and derivatives
M182T231	L-Tyrosine	Organic acids and derivatives	Carboxylic acids and derivatives	Amino acids, peptides, and analogues
M236T575	Lubimin	Hydrocarbon derivatives	Organic oxides	Alcohols and polyols
M285T569	Luteolin	Phenylpropanoids and polyketides	Flavonoids	Flavones
M115T97	Maleic acid	Others	Others	Others
M281T760	Malonoben	Benzenoids	Benzene and substituted derivatives	Phenylpropanes
M665T104	Maltotetraose	Organic oxygen compounds	Organooxygen compounds	Carbohydrates and carbohydrate conjugates
M181T95	Mannitol	Organic oxygen compounds	Organooxygen compounds	Carbohydrates and carbohydrate conjugates
M259T81	Mannose 6-phosphate	Organic oxygen compounds	Organooxygen compounds	Carbohydrates and carbohydrate conjugates
M247T706	Matricarin	Lipids and lipid-like molecules	Prenol lipids	Sesquiterpenoids
M109T946	m-Cresol	Benzenoids	Phenols	Cresols
M344T907	Medroxyprogesterone	Lipids and lipid-like molecules	Steroids and steroid derivatives	Pregnane steroids
M343T97	Melibiitol	Hydrocarbon derivatives	Fatty Acyls	Alcohols and polyols
M341T99	Melibiose	Organic oxygen compounds	Organooxygen compounds	Carbohydrates and carbohydrate conjugates
M130T75_2	Mesaconate	Others	Others	Others
M180T425	Metanephrine	Benzenoids	Phenols	Methoxyphenols
M190T297	Methyl (indol-3-yl)acetate	Organoheterocyclic compounds	Indoles and derivatives	Indolyl carboxylic acids and derivatives
M177T36	Methyl beta-D-galactoside	Others	Others	Others
M224T929	Methyl jasmonate	Lipids and lipid-like molecules	Fatty Acyls	Lineolic acids and derivatives
M211T743	Methyldopa	Phenylpropanoids and polyketides	Phenylpropanoic acids	Others
M179T734	Methyleugenol	Benzenoids	Benzene and substituted derivatives	Anisoles
M179T482	Methylisoeugenol	Benzenoids	Benzene and substituted derivatives	Methoxybenzenes
M234T882	Methylphenidate	Organic nitrogen compounds	Organonitrogen compounds	Amines
M180T313	Mexiletine	Benzenoids	Phenol ethers	Others
M334T299	Mitomycin	Organoheterocyclic compounds	Indoles and derivatives	Indolequinones
M181T956	myo-Inositol	Organic oxygen compounds	Organooxygen compounds	Alcohols and polyols
M227T880	Myristic acid	Lipids and lipid-like molecules	Fatty Acyls	Fatty acids and conjugates
M193T585	Myristicin	Organoheterocyclic compounds	Benzodioxoles	Others
M209T720	Myristoleic acid	Lipids and lipid-like molecules	Fatty Acyls	Fatty acids and conjugates
M161T616	N(6)-Methyllysine	Organic acids and derivatives	Carboxylic acids and derivatives	Amino acids, peptides, and analogues
M161T695	N(alpha)-Acetyl-L-2,4-diaminobutyrate	Others	Others	Others
M192T674	N,N-Diethyl-m-toluamide	Others	Pesticides/Herbicides	Others
M136T283	N,N-Dimethyl-1,4-phenylenediamine	Others	Others	Others
M232T324	N2-Succinyl-L-ornithine	Organic acids and derivatives	Carboxylic acids and derivatives	Amino acids, peptides, and analogues
M189T375	N6-Acetyl-L-lysine	Hydrocarbon derivatives	Carboximidic acids and derivatives	Amines
M205T400	N6-Acetyl-N6-hydroxy-L-lysine	Others	Others	Others
M217T485	N-a-Acetylcitrulline	Organic acids and derivatives	Carboxylic acids and derivatives	Amino acids, peptides, and analogues
M221T407	N-Acetyl-D-glucosamine	Organic oxygen compounds	Organooxygen compounds	Carbohydrates and carbohydrate conjugates
M190T209	N-Acetylglutamic acid	Organic acids and derivatives	Carboxylic acids and derivatives	Amino acids, peptides, and analogues
M156T328	N-Acetylleucine	Hydrocarbon derivatives	Carboximidic acids and derivatives	Amino acids, peptides, and analogues
M222T101	N-Acetylmannosamine	Organic oxygen compounds	Organooxygen compounds	Carbohydrates and carbohydrate conjugates
M199T815	N-Acetylserotonin	Organoheterocyclic compounds	Indoles and derivatives	Hydroxyindoles
M328T368	Naloxone	Benzenoids	Phenanthrenes and derivatives	Others
M189T506	N-Alpha-acetyllysine	Organic acids and derivatives	Carboxylic acids and derivatives	Amino acids, peptides, and analogues
M169T500	Nalpha-Methylhistidine	Others	Others	Others
M440T730	N-Arachidonyl dopamine	Others	Others	Others
M243T340	N-Demethylindolmycin	Others	Others	Others
M195T629	Neocnidilide	Organoheterocyclic compounds	Lactones	Gamma butyrolactones
M123T154	Niacinamide	Organoheterocyclic compounds	Pyridines and derivatives	Pyridinecarboxylic acids and derivatives
M256T106	Nicotinate D-ribonucleoside	Organic oxygen compounds	Organooxygen compounds	Carbohydrates and carbohydrate conjugates
M161T812	Nicotine	Organoheterocyclic compounds	Pyridines and derivatives	Pyrrolidinylpyridines
M124T145	Nicotinic acid	Organoheterocyclic compounds	Pyridines and derivatives	Pyridinecarboxylic acids and derivatives
M162T144	N-methyl-L-glutamic Acid	Organic acids and derivatives	Carboxylic acids and derivatives	Amino acids, peptides, and analogues
M152T328	N-Methyltyramine	Benzenoids	Benzene and substituted derivatives	Phenethylamines
M297T802_2	Nonadecanoic acid	Lipids and lipid-like molecules	Fatty Acyls	Fatty acids and conjugates
M220T774	Nootkatol	Hydrocarbon derivatives	Organooxygen compounds	Alcohols and polyols
M219T942	Nootkatone	Lipids and lipid-like molecules	Prenol lipids	Sesquiterpenoids
M286T391	Norcodeine	Alkaloids and derivatives	Morphinans	Others
M170T949	Norepinephrine	Benzenoids	Phenols	Benzenediols
M298T596	Norethindrone	Lipids and lipid-like molecules	Steroids and steroid derivatives	Estrane steroids
M320T312	Norfloxacin	Organoheterocyclic compounds	Quinolines and derivatives	Quinoline carboxylic acids
M166T333	Normetanephrine	Benzenoids	Phenols	Methoxyphenols
M149T191	Nornicotine	Organoheterocyclic compounds	Pyridines and derivatives	Pyrrolidinylpyridines
M174T396	Norselegiline	Others	Others	Others
M112T285	N-Vinyl-2-pyrrolidone	Others	Textile Chemicals/Auxiliary/Dyes; Extractables/Leachables; Personal Care Products/Cosmetics; Industrial Chemicals	Others
M204T145	O-Acetylcarnitine	Others	Others	Others
M283T914	Octadecanamide	Others	Extractables/Leachables	Others
M282T914	Oleic acid	Lipids and lipid-like molecules	Fatty Acyls	Fatty acids and conjugates
M251T745	OPEO	Others	Extractables/Leachables; Textile Chemicals/Auxiliary/Dyes	Others
M142T110	O-Phosphoethanolamine	Organic acids and derivatives	Organic phosphoric acids and derivatives	Phosphate esters
M212T473	Orciprenaline	Benzenoids	Phenols	Benzenediols
M135T453	o-Toluate	Benzenoids	Benzene and substituted derivatives	Benzoic acids and derivatives
M189T78	Oxalosuccinic acid	Hydrocarbon derivatives	Carboxylic acids and derivatives	Alpha-keto acids and derivatives
M159T114	Oxoadipic acid	Organic acids and derivatives	Keto acids and derivatives	Medium-chain keto acids and derivatives
M146T74	Oxoglutaric acid	Organic acids and derivatives	Keto acids and derivatives	Gamma-keto acids and derivatives
M107T541	o-Xylene	Benzenoids	Benzene and substituted derivatives	Xylenes
M255T843_2	Palmitic acid	Lipids and lipid-like molecules	Fatty Acyls	Fatty acids and conjugates
M138T99	p-Aminobenzoic acid	Benzenoids	Benzene and substituted derivatives	Benzoic acids and derivatives
M151T309	p-Anisic acid	Benzenoids	Benzene and substituted derivatives	Benzoic acids and derivatives
M220T294	Pantothenic acid	Organooxygen compounds	Alcohols and polyols	Polyols
M263T542	Parthenin	Others	Others	Others
M248T625	Parthenolide	Others	Others	Others
M109T464	p-Cresol	Benzenoids	Benzene and substituted derivatives	1-hydroxy-2-unsubstituted benzenoids
M188T143	Peganine	Others	Others	Others
M157T655	Pelargonic acid	Lipids and lipid-like molecules	Fatty Acyls	Fatty acids and conjugates
M167T455	Perillic acid	Lipids and lipid-like molecules	Prenol lipids	Monoterpenoids
M153T543	Perillyl alcohol	Lipids and lipid-like molecules	Prenol lipids	Monoterpenoids
M151T490	Perillyl aldehyde	Lipids and lipid-like molecules	Prenol lipids	Monoterpenoids
M335T564	PGA1	Lipids and lipid-like molecules	Fatty Acyls	Eicosanoids
M180T320	Phenacetin	Others	Others	Others
M135T802	Phenyl acetate	Others	Others	Others
M121T750	Phenylacetaldehyde	Benzenoids	Benzene and substituted derivatives	Phenylacetaldehydes
M137T360	Phenylacetic acid	Benzenoids	Benzene and substituted derivatives	Others
M194T387	Phenylacetylglycine	Organic acids and derivatives	Carboxylic acids and derivatives	Amino acids, peptides, and analogues
M309T524	Phenylbutazone	Benzenoids	Benzene and substituted derivatives	Others
M138T242	Phenylethanolamine	Organic nitrogen compounds	Organonitrogen compounds	Amines
M121T934	Phenylethylamine	Benzenoids	Benzene and substituted derivatives	Phenethylamines
M165T296	Phenyllactate	Phenylpropanoids and polyketides	Phenylpropanoic acids	Others
M149T546	Phenylpropanoate	Phenylpropanoids and polyketides	Phenylpropanoic acids	Others
M164T232	Phenylpyruvic acid	Benzenoids	Benzene and substituted derivatives	Phenylpyruvic acid derivatives
M157T925	Phosphoglycolic acid	Organic acids and derivatives	Organic phosphoric acids and derivatives	Phosphate esters
M185T428	Phosphorylcholine	Organic nitrogen compounds	Organonitrogen compounds	Quaternary ammonium salts
M165T824	Phthalic acid	Benzenoids	Benzene and substituted derivatives	Benzoic acids and derivatives
M275T636	Physostigmine	Organoheterocyclic compounds	Indoles and derivatives	Pyrroloindoles
M243T512	Piceatannol	Phenylpropanoids and polyketides	Stilbenes	Others
M124T896	Picolinic acid	Organoheterocyclic compounds	Pyridines and derivatives	Pyridinecarboxylic acids and derivatives
M141T441	Pimelic acid	Lipids and lipid-like molecules	Fatty Acyls	Fatty acids and conjugates
M130T103	Pipecolic acid	Organic acids and derivatives	Carboxylic acids and derivatives	Amino acids, peptides, and analogues
M235T836	Polygodial	Others	Endogenous Metabolites	Others
M226T615	Porphobilinogen	Organic nitrogen compounds	Organonitrogen compounds	Amines
M186T330	Propanoylagmatine	Hydrocarbon derivatives	Carboxylic acids and derivatives	Carbonyl compounds
M210T283	Propoxur	Others	Others	Others
M351T713	Prostaglandin F3a	Lipids and lipid-like molecules	Fatty Acyls	Eicosanoids
M153T104	Protocatechuic acid	Benzenoids	Benzene and substituted derivatives	Benzoic acids and derivatives
M179T232	Pseudooxynicotine	Organic oxygen compounds	Organooxygen compounds	Carbonyl compounds
M163T636	Pterin	Organoheterocyclic compounds	Pteridines and derivatives	Pterins and derivatives
M152T449	Pulegone	Lipids and lipid-like molecules	Prenol lipids	Monoterpenoids
M289T644	Pyrethrosin	Others	Others	Others
M152T107_2	Pyridoxine	Organoheterocyclic compounds	Pyridines and derivatives	Pyridoxines
M128T94	Pyroglutamic acid	Organic acids and derivatives	Carboxylic acids and derivatives	Amino acids, peptides, and analogues
M111T972	Pyrrole-2-carboxylic acid	Organoheterocyclic compounds	Pyrroles	Pyrrole carboxylic acids and derivatives
M265T553	Qing Hau Sau	Others	Endogenous Metabolites; Natural Products/Medicines	Others
M231T724	Quadrone	Others	Others	Others
M191T32	Quinate	Others	Others	Others
M129T109	Quinoline	Organoheterocyclic compounds	Quinolines and derivatives	Others
M166T80	Quinolinic acid	Organoheterocyclic compounds	Pyridines and derivatives	Pyridinecarboxylic acids and derivatives
M153T946	Resorcinol monoacetate	Others	Others	Others
M267T547	Retinol	Others	Others	Others
M151T934	Ribitol	Organic oxygen compounds	Organooxygen compounds	Carbohydrates and carbohydrate conjugates
M376T735	Riboflavin	Organoheterocyclic compounds	Pteridines and derivatives	Alloxazines and isoalloxazines
M288T352	Ritodrine	Benzenoids	Benzene and substituted derivatives	Phenethylamines
M360T615	Rosmarinic acid	Phenylpropanoids and polyketides	Cinnamic acids and derivatives	Hydroxycinnamic acids and derivatives
M277T606	Saccharopine	Organic acids and derivatives	Carboxylic acids and derivatives	Amino acids, peptides, and analogues
M398T736	S-Adenosylmethionine	Others	Others	Others
M137T316_1	Salicylic acid	Benzenoids	Benzene and substituted derivatives	Benzoic acids and derivatives
M330T93	Salutaridinol	Others	Others	Others
M191T602	Scopoletin	Phenylpropanoids and polyketides	Coumarins and derivatives	Hydroxycoumarins
M185T499	Sebacic acid	Lipids and lipid-like molecules	Fatty Acyls	Fatty acids and conjugates
M345T499	Secoisolariciresinol	Lignans, neolignans and related compounds	Dibenzylbutane lignans	Dibenzylbutanediol lignans
M209T104	Sedoheptulose	Organic oxygen compounds	Organooxygen compounds	Carbohydrates and carbohydrate conjugates
M183T77	Se-Methylselenocysteine	Organic acids and derivatives	Carboxylic acids and derivatives	Amino acids, peptides, and analogues
M237T368	Sepiapterin	Hydrocarbon derivatives	Azacyclic compounds	Alcohols and polyols
M391T915	S-Hexyl-glutathione	Others	Others	Others
M173T107	Shikimic acid	Organic oxygen compounds	Organooxygen compounds	Alcohols and polyols
M209T566	Sinapoyl aldehyde	Others	Others	Others
M415T742	Sodium deoxycholate	Others	Others	Others
M183T948	Sorbitol	Organic oxygen compounds	Organooxygen compounds	Carbohydrates and carbohydrate conjugates
M145T883	Spermidine	Organic nitrogen compounds	Organonitrogen compounds	Amines
M284T876	Sphinganine	Organic nitrogen compounds	Organonitrogen compounds	Amines
M283T843	Stearic acid	Lipids and lipid-like molecules	Fatty Acyls	Fatty acids and conjugates
M277T731	Stearidonic acid	Lipids and lipid-like molecules	Fatty Acyls	Lineolic acids and derivatives
M173T140	Suberic acid	Lipids and lipid-like molecules	Fatty Acyls	Fatty acids and conjugates
M102T973	Succinic acid semialdehyde	Lipids and lipid-like molecules	Fatty Acyls	Fatty acids and conjugates
M342T435	Sucrose	Organic oxygen compounds	Organooxygen compounds	Carbohydrates and carbohydrate conjugates
M197T224	Syringic acid	Benzenoids	Benzene and substituted derivatives	Benzoic acids and derivatives
M303T450	Taxifolin	Others	Others	Others
M165T106	Terephthalate	Benzenoids	Benzene and substituted derivatives	Benzoic acids and derivatives
M314T476	Tetrahydrocannabinol	Organoheterocyclic compounds	Benzopyrans	1-benzopyrans
M136T493	Tetrahydropteridine	Organoheterocyclic compounds	Pteridines and derivatives	Others
M179T936	Theobromine	Organoheterocyclic compounds	Imidazopyrimidines	Purines and purine derivatives
M180T150	Theophylline	Organoheterocyclic compounds	Imidazopyrimidines	Purines and purine derivatives
M223T694	Thymidine	Nucleosides, nucleotides, and analogues	Pyrimidine nucleosides	Pyrimidine 2'-deoxyribonucleosides
M126T923	Thymine	Organoheterocyclic compounds	Diazines	Pyrimidines and pyrimidine derivatives
M151T510	Thymol	Lipids and lipid-like molecules	Prenol lipids	Monoterpenoids
M269T282	Tolbutamide	Benzenoids	Benzene and substituted derivatives	Benzenesulfonamides
M115T866	trans-1,2-Cyclohexanediol	Others	Others	Others
M129T93	trans-Cinnamate	Others	Others	Others
M195T287	trans-Ferulic acid	Phenylpropanoids and polyketides	Cinnamic acids and derivatives	Hydroxycinnamic acids and derivatives
M209T579	trans-Isoasarone	Benzenoids	Benzene and substituted derivatives	Phenols and derivatives
M211T636	Traumatic Acid	Others	Others	Others
M342T95	Trehalose	Organic oxygen compounds	Organooxygen compounds	Carbohydrates and carbohydrate conjugates
M127T98	Triacetate lactone	Others	Others	Others
M101T122	Triethylamine	Organonitrogen compounds	Amines	Tertiary amines
M165T317	Tropate	Organic acids and derivatives	Hydroxy acids and derivatives	Beta hydroxy acids and derivatives
M121T615	Tyrosol	Benzenoids	Phenols	Tyrosols and derivatives
M251T706	Ubiquinone-1	Others	Others	Others
M185T775	Undecanoic acid	Lipids and lipid-like molecules	Fatty Acyls	Fatty acids and conjugates
M159T123	Ureidosuccinic acid	Hydrocarbon derivatives	Carboximidic acids and derivatives	Amino acids, peptides, and analogues
M169T153	Uric acid	Organoheterocyclic compounds	Imidazopyrimidines	Purines and purine derivatives
M245T223	Uridine	Nucleosides, nucleotides, and analogues	Pyrimidine nucleosides	Others
M137T156	Urocanic acid	Organoheterocyclic compounds	Azoles	Imidazoles
M393T920	Ursodeoxycholic acid	Lipids and lipid-like molecules	Steroids and steroid derivatives	Bile acids, alcohols and derivatives
M265T914	Vaccenic acid	Lipids and lipid-like molecules	Fatty Acyls	Fatty acids and conjugates
M167T155	Vanillic acid	Benzenoids	Benzene and substituted derivatives	Benzoic acids and derivatives
M151T532	Vanillin	Benzenoids	Phenols	Methoxyphenols
M197T423	Vanillylmandelic acid	Benzenoids	Phenols	Methoxyphenols
M165T236	Vanylglycol	Benzenoids	Phenols	Methoxyphenols
M260T511	Venlafaxine	Benzenoids	Phenol ethers	Anisoles
M247T732	Vulgarin	Lipids and lipid-like molecules	Prenol lipids	Sesquiterpenoids
M153T204	Xanthine	Organoheterocyclic compounds	Imidazopyrimidines	Purines and purine derivatives
M267T627	Xanthoxic acid	Others	Others	Others
M251T528	Xanthoxin	Others	Others	Others
M195T317	Xanthoxylin	Organic oxygen compounds	Organooxygen compounds	Carbonyl compounds
M353T736	Yohimbine	Alkaloids and derivatives	Yohimbine alkaloids	Others
M218T725	Zerumbone	Lipids and lipid-like molecules	Prenol lipids	Sesquiterpenoids
M193T703	Zingerone	Benzenoids	Benzene and substituted derivatives	Phenols and derivatives

## Sheet: Table S2
Table S2. Compounds of essential oil from Phoebe zhennan wood identified by LC-MS
No.	Compound name	Relative contents (%)
		10a		30a		80a
		mean	range	mean	range	mean	range
1	Carvone	1.83145	1.79-1.88	8.21776	7.64-8.59	0.00539539	0.01-0.01
2	Bornyl acetate	0.116532	0.11-0.12	0.287853	0.27-0.3	0.107417	0.08-0.19
3	Abscisic acid	0.148192	0.14-0.16	0.251474	0.24-0.27	0.00778552	0.01-0.01
4	4,5-Dihydroorotic acid	0.449511	0.44-0.46	0.387906	0.37-0.4	0.73364	0.67-0.79
5	4-Hydroxystyrene	0.215199	0.21-0.22	0.585691	0.55-0.62	0.0115257	0.01-0.01
6	4-Methylbenzyl alcohol	0.0106483	0.01-0.01	0.325198	0.31-0.34	0.0115172	0.01-0.01
7	5-Aminopentanoic acid	29.7733	29.36-30.23	18.8977	17.99-19.63	12.7993	12.0-13.8
8	9,12,13-TriHOME	0.520464	0.51-0.53	0.469629	0.45-0.49	0.0472524	0.03-0.07
9	Alantolactone	0.573565	0.57-0.58	1.27597	1.22-1.38	0.589842	0.49-0.64
10	Alanyl-L-lysine	0.212865	0.21-0.22	0.803286	0.77-0.87	0.143011	0.12-0.16
11	Caryophyllene	0.398701	0.39-0.4	0.469153	0.45-0.51	1.62864	1.53-1.73
12	Cubebene	8.45709	8.34-8.59	8.08366	7.73-8.74	21.5638	21.46-21.66
13	Santalol	1.30651	1.29-1.33	2.23365	2.14-2.42	0.301358	0.21-0.38
14	Selinene	1.97921	1.95-2.01	1.56427	1.5-1.69	1.19382	1.09-1.29
15	Caproic acid	0.602257	0.59-0.61	0.868316	0.83-0.94	0.00154734	0.00-0.00
16	Capsidiol	0.326216	0.32-0.33	0.324979	0.31-0.35	0.0545441	0.03-0.07
17	Caryophyllene alpha-oxide	2.54836	2.51-2.59	4.26527	4.08-4.61	0.739254	0.64-0.84
18	Confertifolin	0.719277	0.71-0.73	1.63937	1.57-1.77	0.111867	0.05-0.16
19	Cuminaldehyde	0.0756001	0.07-0.08	0.484198	0.46-0.52	0.00403516	0.00-0.00
20	Cyromazine	0.0635459	0.06-0.06	0.814717	0.78-0.88	0.00407488	0.00-0.00
21	Diethylpropion	1.51154	1.49-1.53	4.90682	4.69-5.31	0.0579911	0.02-0.08
22	Epsilon-caprolactam	0.368627	0.36-0.37	0.302459	0.29-0.33	0.00606068	0.01-0.01
23	Gentisic acid	3.74821	3.7-3.79	3.12216	3.00-3.28	5.36876	5.17-5.57
24	Guanidoacetic acid	9.938	9.82-10.05	8.31168	7.99-8.74	14.5467	14.35-14.75
25	Hinesol	0.176128	0.17-0.18	0.248824	0.24-0.26	0.178109	0.14-0.23
26	Hydroquinone	2.03115	2.01-2.05	1.73828	1.67-1.83	2.96635	2.87-3.07
27	L-Homoserine	1.92042	1.9-1.94	0.294062	0.28-0.31	12.6104	12.51-12.71
28	Limonene-1,2-diol	2.73265	2.7-2.76	2.02936	1.95-2.13	0.00198069	0.00-0.00
29	Matricarin	0.430071	0.4-0.44	0.646893	0.62-0.68	0.599096	0.53-0.67
30	Medroxyprogesterone	1.76111	1.63-1.81	0.454381	0.44-0.48	2.25058	2.15-2.35
31	Methyldopa	0.490538	0.45-0.5	0.569659	0.55-0.6	1.07069	0.97-1.17
32	Mexiletine	0.0723207	0.07-0.07	0.575868	0.55-0.61	0.00183808	0.00-0.00
33	N(6)-Methyllysine	0.0405532	0.04-0.04	0.219319	0.21-0.23	0.0200818	0.02-0.02
34	N,N-Diethyl-m-toluamide	0.0420783	0.04-0.04	0.229653	0.22-0.24	0.0289008	0.03-0.03
35	Nootkatol	3.77903	3.5-3.89	5.30636	5.01-5.7	4.30009	4.23-4.37
36	Nootkatone	0.266476	0.25-0.27	0.218949	0.21-0.24	0.589309	0.49-0.69
37	Norepinephrine	0.663879	0.62-0.68	0.606325	0.57-0.64	1.00843	0.96-1.11
38	Norselegiline	0.226122	0.21-0.23	0.808934	0.76-0.86	0.000875989	0.00-0.00
39	Perillic acid	0.0651017	0.06-0.07	1.27451	1.19-1.36	0.00321373	0.00-0.00
40	Phenyl acetate	1.0173	0.94-1.05	0.804532	0.75-0.86	0.24996	0.15-0.35
41	Polygodial	0.259225	0.24-0.27	0.300927	0.28-0.32	0.0451493	0.03-0.07
42	Scopoletin	0.815863	0.75-0.84	0.534342	0.5-0.57	0.165317	0.11-0.23
43	Sorbitol	1.12769	1.04-1.16	0.971076	0.91-1.03	1.76024	1.66-1.86
44	trans-1,2-Cyclohexanediol	0.743843	0.69-0.76	0.664047	0.62-0.71	1.56106	1.46-1.66
45	Ureidosuccinic acid	0.330263	0.33-0.34	0.883584	0.83-0.94	0.0114073	0.01-0.01
46	Xanthoxic acid	1.85579	1.83-1.88	0.691799	0.64-0.72	0.2132	0.16-0.26
47	Xanthoxin	0.529881	0.52-0.54	0.808182	0.74-0.85	0.024423	0.02-0.02
48	1-Methyladenosine	0.144621	0.14-0.15	0.155258	0.15-0.16	0.287434	0.25-0.33
49	2',4'-Dihydroxyacetophenone	0.221942	0.21-0.23	0.189849	0.18-0.2	0.324437	0.28-0.36
50	4-Quinolinecarboxylic acid	0.108841	0.11-0.11	0.120413	0.11-0.13	0.221572	0.18-0.27
51	Creatinine	0.152662	0.15-0.15	0.132915	0.13-0.14	0.207558	0.18-0.26
52	Deoxyuridine	0.0218417	0.02-0.02	0.0201657	0.02-0.02	0.221564	0.16-0.29
53	Diisobutyl phthalate	0.0901466	0.09-0.09	0.0267465	0.03-0.03	0.343388	0.31-0.36
54	Dodecanoic acid	0.0875222	0.09-0.09	0.0298309	0.03-0.03	0.403614	0.35-0.50
55	L-2,4-diaminobutyric acid	0.0276443	0.03-0.03	0.109857	0.11-0.12	0.205244	0.15-0.27
56	Thymine	0.218555	0.2-0.22	0.140862	0.13-0.15	0.327428	0.25-0.43
57	Triethylamine	0.0325888	0.03-0.03	0.0764798	0.07-0.08	0.252775	0.20-0.30
58	Abscisic alcohol	1.14935	1.13-1.17	0.122175	0.12-0.13	0.0238916	0.01-0.05
59	L-Tryptophan	0.295171	0.27-0.3	0.0541345	0.05-0.06	0.00571683	0.01-0.01
Only compounds with more than 0.2% of total area were listed

## Sheet: Table S3
Table S3. The metabolites and classification of essential oil in wood samples with three tree ages by GC-MS
Name	Superclass	Class	Subclass
Bicyclo[3.1.1]heptan-3-ol, 6,6-dimethyl-2-methylene-, [1S-(1.α.,3.α.,5.α.)]-	Lipids and lipid-like molecules	Prenol lipids	Monoterpenoids
Verbenol	Lipids and lipid-like molecules	Prenol lipids	Monoterpenoids
Bicyclo[3.1.1]heptan-3-one, 2,6,6-trimethyl-, (1.α.,2.β.,5.α.)-	Lipids and lipid-like molecules	Prenol lipids	Monoterpenoids
3-Cyclohexene-1-methanol, .α.,.α.,4-trimethyl-, (R)-	Lipids and lipid-like molecules	Prenol lipids	Monoterpenoids
Myrtenol	Others	Others	Others
Bicyclo[3.1.1]hept-3-en-2-one, 4,6,6-trimethyl-, (1S)-	Others	Others	Others
Cubebene	Lipids and lipid-like molecules	Prenol lipids	Sesquiterpenoids
Copaene	Lipids and lipid-like molecules	Prenol lipids	Sesquiterpenoids
Cyclohexane, 1-ethenyl-1-methyl-2,4-bis(1-methylethenyl)-, [1S-(1.α.,2.β.,4.β.)]-	Lipids and lipid-like molecules	Prenol lipids	Sesquiterpenoids
1H-Cyclopropa[a]naphthalene, 1a,2,6,7,7a,7b-hexahydro-1,1,7,7a-tetramethyl-, [1aR-(1a.α.,7.α.,7a.α.,7b.α.)]-	Others	Others	Others
1H-Cyclopropa[a]naphthalene, 1a,2,3,5,6,7,7a,7b-octahydro-1,1,7,7a-tetramethyl-, [1aR-(1a.α.,7.α.,7a.α.,7b.α.)]-	Others	Others	Others
cis-.α.-Bergamotene	Lipids and lipid-like molecules	Prenol lipids	Monoterpenoids
(1R,3aS,8aS)-7-Isopropyl-1,4-dimethyl-1,2,3,3a,6,8a-hexahydroazulene	Others	Others	Others
1,4,7,-Cycloundecatriene, 1,5,9,9-tetramethyl-, Z,Z,Z-	Others	Others	Others
Caryophyllene	Lipids and lipid-like molecules	Prenol lipids	Sesquiterpenoids
Muurolene	Lipids and lipid-like molecules	Prenol lipids	Sesquiterpenoids
Benzene, 1-(1,5-dimethyl-4-hexenyl)-4-methyl-	Others	Others	Others
(3R,3aR,3bR,4S,7R,7aR)-4-Isopropyl-3,7-dimethyloctahydro-1H-cyclopenta[1,3]cyclopropa[1,2]benzen-3-ol	Lipids and lipid-like molecules	Prenol lipids	Sesquiterpenoids
Azulene, 1,2,3,5,6,7,8,8a-octahydro-1,4-dimethyl-7-(1-methylethenyl)-, [1S-(1.α.,7.α.,8a.β.)]-	Lipids and lipid-like molecules	Prenol lipids	Sesquiterpenoids
(1R,2S,6S,7S,8S)-8-Isopropyl-1-methyl-3-methylenetricyclo[4.4.0.02,7]decane-rel-	Others	Others	Others
Naphthalene, 1,2,3,5,6,8a-hexahydro-4,7-dimethyl-1-(1-methylethyl)-, (1S-cis)-	Lipids and lipid-like molecules	Prenol lipids	Sesquiterpenoids
Cyclohexanemethanol, 4-ethenyl-.α.,.α.,4-trimethyl-3-(1-methylethenyl)-, [1R-(1.α.,3.α.,4.β.)]-	Lipids and lipid-like molecules	Prenol lipids	Sesquiterpenoids
4-Isopropyl-6-methyl-1-methylene-1,2,3,4-tetrahydronaphthalene	Others	Others	Others
(1R,7S,E)-7-Isopropyl-4,10-dimethylenecyclodec-5-enol	Lipids and lipid-like molecules	Prenol lipids	Sesquiterpenoids
1-((1R,2R,3R)-2-(3-Isopropylfuran-2-yl)-3-methylcyclopentyl)ethanone	Others	Others	Others
(1R,3E,7E,11R)-1,5,5,8-Tetramethyl-12-oxabicyclo[9.1.0]dodeca-3,7-diene	Organoheterocyclic compounds	Epoxides	Others
2-((2S,4aR)-4a,8-Dimethyl-1,2,3,4,4a,5,6,7-octahydronaphthalen-2-yl)propan-2-ol	Lipids and lipid-like molecules	Prenol lipids	Sesquiterpenoids
4a(2H)-Naphthalenol, 1,3,4,5,6,8a-hexahydro-4,7-dimethyl-1-(1-methylethyl)-, (1S,4S,4aS,8aR)-	Others	Others	Others
Guaiol	Lipids and lipid-like molecules	Prenol lipids	Sesquiterpenoids
2-((2R,8R,8aS)-8,8a-Dimethyl-1,2,3,4,6,7,8,8a-octahydronaphthalen-2-yl)propan-2-ol	Lipids and lipid-like molecules	Prenol lipids	Sesquiterpenoids
Cadalene	Lipids and lipid-like molecules	Prenol lipids	Sesquiterpenoids
8-Isopropyl-1,5-dimethyltricyclo[4.4.0.02,7]dec-4-en-3-one	Lipids and lipid-like molecules	Prenol lipids	Sesquiterpenoids
1H-Naphtho[2,1-b]pyran, 3-ethenyldodecahydro-3,4a,7,7,10a-pentamethyl-, [3R-(3.α.,4a.β.,6a.α.,10a.β.,10b.α.)]-	Others	Others	Others
Bicyclo[3.1.1]hept-2-ene, 2,6-dimethyl-6-(4-methyl-3-pentenyl)-	Others	Others	Others
Naphthalene, 1,2,3,4,4a,5,6,8a-octahydro-7-methyl-4-methylene-1-(1-methylethyl)-, (1.α.,4a.β.,8a.α.)-	Lipids and lipid-like molecules	Prenol lipids	Sesquiterpenoids
5-Methyl-2,4-diisopropylphenol	Lipids and lipid-like molecules	Prenol lipids	Monoterpenoids
Agarospirol	Lipids and lipid-like molecules	Prenol lipids	Sesquiterpenoids
2-Naphthalenemethanol, decahydro-.α.,.α.,4a-trimethyl-8-methylene-, [2R-(2.α.,4a.α.,8a.β.)]-	Others	Others	Others
Eudesmol	Others	Others	Others
Naphthalene, 1,2,4a,5,6,8a-hexahydro-4,7-dimethyl-1-(1-methylethyl)-	Others	Others	Others
Bicyclo[7.2.0]undec-4-ene, 4,11,11-trimethyl-8-methylene-,[1R-(1R*,4Z,9S*)]-	Lipids and lipid-like molecules	Prenol lipids	Sesquiterpenoids
(8R,8aS)-8,8a-Dimethyl-2-(propan-2-ylidene)-1,2,3,7,8,8a-hexahydronaphthalene	Others	Others	Others
(1S,4S,4aS)-1-Isopropyl-4,7-dimethyl-1,2,3,4,4a,5-hexahydronaphthalene	Others	Others	Others
Farnesene	Lipids and lipid-like molecules	Prenol lipids	Sesquiterpenoids
(3S,3aR,3bR,4S,7R,7aR)-4-Isopropyl-3,7-dimethyloctahydro-1H-cyclopenta[1,3]cyclopropa[1,2]benzen-3-ol	Others	Others	Others
Spathulenol	Others	Others	Others
Caryophyllene oxide	Lipids and lipid-like molecules	Prenol lipids	Sesquiterpenoids
Viridflorol	Lipids and lipid-like molecules	Prenol lipids	Sesquiterpenoids
5-Azulenemethanol, 1,2,3,4,5,6,7,8-octahydro-.α.,.α.,3,8-tetramethyl-, acetate, [3S-(3.α.,5.α.,8.α.)]-	Lipids and lipid-like molecules	Prenol lipids	Sesquiterpenoids
(E)-3-((4S,7R,7aR)-3,7-Dimethyl-2,4,5,6,7,7a-hexahydro-1H-inden-4-yl)-2-methylacrylaldehyde	Lipids and lipid-like molecules	Prenol lipids	Sesquiterpenoids
((8R,8aS)-8-Isopropyl-5-methyl-3,4,6,7,8,8a-hexahydronaphthalen-2-yl)methanol	Others	Others	Others
p-Mentha-1,5-dien-8-ol	Others	Others	Others
Naphthalene, 1,2,3,5,6,7,8,8a-octahydro-1,8a-dimethyl-7-(1-methylethenyl)-, [1R-(1.α.,7.β.,8a.α.)]-	Others	Others	Others
1H-Cycloprop[e]azulen-7-ol, decahydro-1,1,7-trimethyl-4-methylene-, [1ar-(1a.α.,4a.α.,7.β.,7a.β.,7b.α.)]-	Lipids and lipid-like molecules	Prenol lipids	Sesquiterpenoids
2-Naphthalenemethanol, 1,2,3,4,4a,5,6,8a-octahydro-.α.,.α.,4a,8-tetramethyl-, [2R-(2.α.,4a.α.,8a.β.)]-	Others	Others	Others
TERPINYL FORMATE	Lipids and lipid-like molecules	Prenol lipids	Monoterpenoids
2,2,7,7-Tetramethyltricyclo[6.2.1.0(1,6)]undec-4-en-3-one	Others	Others	Others
Bicyclo[3.1.1]heptan-3-ol, 6,6-dimethyl-2-methylene-	Lipids and lipid-like molecules	Prenol lipids	Monoterpenoids
Bicyclo[2.2.1]heptan-2-ol, 1,7,7-trimethyl-, (1S-endo)-	Lipids and lipid-like molecules	Prenol lipids	Monoterpenoids
Bicyclo[3.1.1]hept-3-en-2-one, 4,6,6-trimethyl-	Others	Others	Others
Ylangene	Lipids and lipid-like molecules	Prenol lipids	Sesquiterpenoids
1,2,4-Metheno-1H-indene, octahydro-1,7a-dimethyl-5-(1-methylethyl)-, [1S-(1.α.,2.α.,3a.β.,4.α.,5.α.,7a.β.,8S*)]-	Others	Others	Others
Humulene	Lipids and lipid-like molecules	Prenol lipids	Sesquiterpenoids
Panasinsen	Lipids and lipid-like molecules	Prenol lipids	Sesquiterpenoids
(5S,6R,7S,10R)-7-Isopropyl-2,10-dimethylspiro[4.5]dec-1-en-6-ol	Others	Others	Others
Uncineol	Lipids and lipid-like molecules	Prenol lipids	Sesquiterpenoids
3-Cyclohexen-1-ol, 1-(1,5-dimethyl-4-hexenyl)-4-methyl-	Lipids and lipid-like molecules	Prenol lipids	Sesquiterpenoids
4-Isopropyl-6-methyl-1-tetralone	Others	Others	Others
endo-Borneol	Lipids and lipid-like molecules	Prenol lipids	Monoterpenoids
Bergamotene	Lipids and lipid-like molecules	Prenol lipids	Monoterpenoids
Fenchol	Lipids and lipid-like molecules	Prenol lipids	Monoterpenoids
Cyclohexene, 4-ethenyl-4-methyl-3-(1-methylethenyl)-1-(1-methylethyl)-, (3R-trans)-	Others	Others	Others
Guaiene	Lipids and lipid-like molecules	Prenol lipids	Sesquiterpenoids
Bisabolene	Lipids and lipid-like molecules	Prenol lipids	Sesquiterpenoids
(2S,4aR,8aR)-4a,8-Dimethyl-2-(prop-1-en-2-yl)-1,2,3,4,4a,5,6,8a-octahydronaphthalene	Others	Others	Others

## Sheet: Table S4
Table S4. Compounds of essential oil from Phoebe zhennan wood identified by GC-MS
No.	Compound name	Relative contents (%)
		10a		30a		80a
		mean	range	mean	range	mean	range
1	Verbenol	0.162895	0.01-0.27	0.463746	0.44-0.51	0.0213887	0.00-0.03
2	Bicyclo[3.1.1]hept-3-en-2-one, 4,6,6-trimethyl-, (1S)-	0.115941	0.03-0.18	0.651801	0.61-0.7	0.0231073	0.02-0.03
3	Cubebene	0.169917	0.06-0.36	0.52056	0.49-0.57	0.0724646	0.06-0.09
4	Copaene	0.260371	0.07-0.51	0.52056	0.49-0.57	0.0724646	0.06-0.09
5	Cyclohexane, 1-ethenyl-1-methyl-2,4-bis(1-methylethenyl)-, [1S-(1.α.,2.β.,4.β.)]-	0.341899	0.05-1.2	0.39904	0.37-0.45	0.161197	0.13-0.2
6	Calarene	1.27649	0.18-4.42	0.371002	0.00-0.80	0	0.00-0.00
7	1H-Cyclopropa[a]naphthalene, 1a,2,3,5,6,7,7a,7b-octahydro-1,1,7,7a-tetramethyl-, [1aR-(1a.α.,7.α.,7a.α.,7b.α.)]-	0.703563	0.04-1.85	0.551997	0.52-0.63	0.0140274	0.00-0.03
8	cis-.α.-Bergamotene	0.190844	0.08-0.29	0.438392	0.41-0.49	0.200029	0.16-0.24
9	(1R,3aS,8aS)-7-Isopropyl-1,4-dimethyl-1,2,3,3a,6,8a-hexahydroazulene	0.578563	0.21-1.16	2.10882	1.94-2.4	1.3999	1.17-1.63
10	1,1,4,8-tetramethyl-cis,cis,4,7,10-cycloundecatriene	1.04581	0.28-1.62	0.0600231	0.00-0.3	0.353671	0.3-0.41
11	Caryophyllene	0.314736	0.05-1.08	0.241291	0.23-0.28	0.131737	0.11-0.15
12	Muurolene	0.2942	0.11-0.57	2.17695	2.05-2.42	0.0741918	0.03-0.10
13	Benzene, 1-(1,5-dimethyl-4-hexenyl)-4-methyl-	0.647178	0.22-1.38	0.498059	0.00-0.84	0.569045	0.44-0.69
14	(3R,3aR,3bR,4S,7R,7aR)-4-Isopropyl-3,7-dimethyloctahydro-1H-cyclopenta[1,3]cyclopropa[1,2]benzen-3-ol	14.0684	0.39-63.68	0.765828	0.63-0.99	1.68273	1.39-1.91
15	Guaijene	1.44635	0.04-6.55	0	0.00-0.00	0.062832	0.05-0.08
16	(1R,2S,6S,7S,8S)-8-Isopropyl-1-methyl-3-methylenetricyclo[4.4.0.02,7]decane-rel-	0.839575	0.12-2.93	0	0.00-0.00	0.0354987	0.00-0.18
17	Cadinene	15.1118	0.04-24.7	1.23809	0.00-5.49	1.40114	0.13-3.57
18	Elemol	0.272072	0.10-0.52	2.11578	1.93-2.47	1.36521	1.13-1.58
19	4-Isopropyl-6-methyl-1-methylene-1,2,3,4-tetrahydronaphthalene	0.680395	0.10-2.36	0	0.00-0.00	0.0643943	0.00-0.1
20	(1R,7S,E)-7-Isopropyl-4,10-dimethylenecyclodec-5-enol	4.78446	0.64-16.58	0	0.00-0.00	0	0.00-0.00
21	1-((1R,2R,3R)-2-(3-Isopropylfuran-2-yl)-3-methylcyclopentyl)ethanone	1.46684	0.46-3.12	0	0.00-0.00	0	0.00-0.00
22	(1R,3E,7E,11R)-1,5,5,8-Tetramethyl-12-oxabicyclo[9.1.0]dodeca-3,7-diene	0.780889	0.19-1.66	1.83138	1.49-2.04	0.469993	0.00-0.90
23	2-((2S,4aR)-4a,8-Dimethyl-1,2,3,4,4a,5,6,7-octahydronaphthalen-2-yl)propan-2-ol	10.9258	2.90-17.02	1.01864	0.00-5.09	5.73353	3.39-7.16
24	Amorphene	0.825282	0.23-1.71	0.782161	0.38-0.93	1.68273	1.39-1.91
25	Guaiol	4.59119	1.08-11.81	4.50519	4.16-5.09	17.901	15.59-20.84
26	Eudesmol	4.9387	1.52-11.53	13.7972	12.94-15.15	15.8595	13.81-18.16
27	Cadalene	10.1042	2.66-15.62	0	0.00-0.00	0	0.00-0.00
28	Mustakone	4.57908	1.58-8.08	0	0.00-0.00	0	0.00-0.00
29	Bicyclo[3.1.1]hept-2-ene, 2,6-dimethyl-6-(4-methyl-3-pentenyl)-	0.226131	0.08-0.46	0.438392	0.41-0.49	0.209228	0.17-0.24
30	5-Methyl-2,4-diisopropylphenol	1.35258	0.00-2.17	0	0.00-0.00	0	0.00-0.00
31	Agarospirol	5.57319	1.88-11.81	21.9521	20.12-24.44	17.901	15.59-20.84
32	Naphthalene, 1,2,4a,5,6,8a-hexahydro-4,7-dimethyl-1-(1-methylethyl)-	0.0986332	0.00-0.20	0.246726	0.18-0.32	0.149806	0.07-0.2
33	Bicyclo[7.2.0]undec-4-ene, 4,11,11-trimethyl-8-methylene-,[1R-(1R*,4Z,9S*)]-	0.0996728	0.00-0.20	0.241291	0.23-0.28	0.131737	0.11-0.15
34	(1S,4S,4aS)-1-Isopropyl-4,7-dimethyl-1,2,3,4,4a,5-hexahydronaphthalene	0.169917	0.06-0.36	0.52056	0.49-0.57	0.0460949	0.00-0.09
35	Farnesene	0.0354412	0.00-0.13	0.26218	0.19-0.34	0.0968903	0.00-0.15
36	(3S,3aR,3bR,4S,7R,7aR)-4-Isopropyl-3,7-dimethyloctahydro-1H-cyclopenta[1,3]cyclopropa[1,2]benzen-3-ol	0.077599	0.00-0.39	0.907962	0.63-1.46	0.278965	0.00-1.39
37	Viridflorol	0.521491	0.00-1.11	3.48656	0.00-4.66	0	0.00-0.00
38	Guaiac acetate	4.9387	1.52-11.53	13.7972	12.94-15.15	12.4607	0.03-18.16
39	Uncineol	0.579245	0.00-2.90	0	0.00-0.00	5.73353	3.39-7.16
40	Bergamotene	0.226131	0.08-0.46	0.438392	0.41-0.49	0.209228	0.17-0.24
41	(8R,8aS)-8,8a-Dimethyl-2-(propan-2-ylidene)-1,2,3,7,8,8a-hexahydronaphthalene	0	0.00-0.00	0.784401	0.73-0.9	0	0.00-0.00
42	Spathulenol	0	0.00-0.00	0.287764	0.23-0.33	0	0.00-0.00
43	Caryophyllene oxide	0	0.00-0.00	3.05467	2.44-3.38	0.33349	0.28-0.37
44	(E)-3-((4S,7R,7aR)-3,7-Dimethyl-2,4,5,6,7,7a-hexahydro-1H-inden-4-yl)-2-methylacrylaldehyde	0	0.00-0.00	3.03833	0.00-4.06	0	0.00-0.00
45	((8R,8aS)-8-Isopropyl-5-methyl-3,4,6,7,8,8a-hexahydronaphthalen-2-yl)methanol	0	0.00-0.00	0.741993	0.00-0.98	0	0.00-0.00
46	Valencen	0	0.00-0.00	2.77163	0.00-13.6	0.0618258	0.00-0.12
47	1H-Cycloprop[e]azulen-7-ol, decahydro-1,1,7-trimethyl-4-methylene-, [1ar-(1a.α.,4a.α.,7.β.,7a.β.,7b.α.)]-	0	0.00-0.00	0.287764	0.23-0.33	0	0.00-0.00
48	2,2,7,7-Tetramethyltricyclo[6.2.1.0(1,6)]undec-4-en-3-one	0	0.00-0.00	1.58845	0.00-4.06	0	0.00-0.00
49	Bicyclo[3.1.1]hept-3-en-2-one, 4,6,6-trimethyl-	0.0061733	0.00-0.03	0.651801	0.61-0.7	0.0231073	0.02-0.03
50	Panasinsen	0	0.00-0.00	0	0.00-0.00	0.612745	0.00-2.4
51	Axenol	0	0.00-0.00	0	0.00-0.00	1.00508	0.81-1.17
52	3-Cyclohexen-1-ol, 1-(1,5-dimethyl-4-hexenyl)-4-methyl-	0	0.00-0.00	0	0.00-0.00	0.505129	0.41-0.65
53	4-Isopropyl-6-methyl-1-tetralone	0	0.00-0.00	0	0.00-0.00	0.213174	0.14-0.30
Only compounds with more than 0.2% of total area were listed

## Sheet: Table S5
Table S5. The metabolites and classification of volatile organic compounds in wood samples with three tree ages by GC-MS
Name	Superclass	Class	Subclass
Cubebene	Lipids and lipid-like molecules	Prenol lipids	Sesquiterpenoids
Benzene, 1-(1,5-dimethyl-4-hexenyl)-4-methyl-	Others	Others	Others
(3R,3aR,3bR,4S,7R,7aR)-4-Isopropyl-3,7-dimethyloctahydro-1H-cyclopenta[1,3]cyclopropa[1,2]benzen-3-ol	Others	Others	Others
Cyclohexanemethanol, 4-ethenyl-.α.,.α.,4-trimethyl-3-(1-methylethenyl)-, [1R-(1.α.,3.α.,4.β.)]-	Lipids and lipid-like molecules	Prenol lipids	Sesquiterpenoids
1H-Cycloprop[e]azulen-4-ol, decahydro-1,1,4,7-tetramethyl-, [1aR-(1a.α.,4.β.,4a.β.,7.α.,7a.β.,7b.α.)]-	Others	Others	Others
(1R,3E,7E,11R)-1,5,5,8-Tetramethyl-12-oxabicyclo[9.1.0]dodeca-3,7-diene	Organoheterocyclic compounds	Epoxides	Others
Guaiol	Lipids and lipid-like molecules	Prenol lipids	Sesquiterpenoids
Uncineol	Lipids and lipid-like molecules	Prenol lipids	Sesquiterpenoids
4a(2H)-Naphthalenol, 1,3,4,5,6,8a-hexahydro-4,7-dimethyl-1-(1-methylethyl)-, (1S,4S,4aS,8aR)-	Others	Others	Others
Agarospirol	Lipids and lipid-like molecules	Prenol lipids	Sesquiterpenoids
2-((2R,8R,8aS)-8,8a-Dimethyl-1,2,3,4,6,7,8,8a-octahydronaphthalen-2-yl)propan-2-ol	Lipids and lipid-like molecules	Prenol lipids	Sesquiterpenoids
Naphthalene, 1,6-dimethyl-4-(1-methylethyl)-	Others	Others	Others
Longiverbenone	Lipids and lipid-like molecules	Prenol lipids	Sesquiterpenoids
Copaene	Lipids and lipid-like molecules	Prenol lipids	Sesquiterpenoids
(3S,3aR,3bR,4S,7R,7aR)-4-Isopropyl-3,7-dimethyloctahydro-1H-cyclopenta[1,3]cyclopropa[1,2]benzen-3-ol	Others	Others	Others
(1R,2S,6S,7S,8S)-8-Isopropyl-1-methyl-3-methylenetricyclo[4.4.0.02,7]decane-rel-	Others	Others	Others
(1R,3aS,8aS)-7-Isopropyl-1,4-dimethyl-1,2,3,3a,6,8a-hexahydroazulene	Others	Others	Others
(1aR,4S,4aR,7R,7aS,7bS)-1,1,4,7-Tetramethyldecahydro-1H-cyclopropa[e]azulen-4-ol	Others	Others	Others
1H-Cyclopenta[1,3]cyclopropa[1,2]benzene, octahydro-7-methyl-3-methylene-4-(1-methylethyl)-, [3aS-(3a.α.,3b.β.,4.β.,7.α.,7aS*)]-	Lipids and lipid-like molecules	Prenol lipids	Sesquiterpenoids
Tricyclo[4.4.0.0(2,7)]dec-3-ene-3-methanol, 1-methyl-8-(1-methylethyl)-	Others	Others	Others
Verbenol	Lipids and lipid-like molecules	Prenol lipids	Monoterpenoids
Bicyclo[3.1.1]hept-3-en-2-one, 4,6,6-trimethyl-	Others	Others	Others
Myrtenol	Others	Others	Others
Bicyclo[3.1.1]hept-3-en-2-one, 4,6,6-trimethyl-, (1S)-	Others	Others	Others
1-((1R,2R,3R)-2-(3-Isopropylfuran-2-yl)-3-methylcyclopentyl)ethanone	Others	Others	Others
Tricyclo[5.2.2.0(1,6)]undecan-3-ol, 2-methylene-6,8,8-trimethyl-	Others	Others	Others
Caryophyllene oxide	Lipids and lipid-like molecules	Prenol lipids	Sesquiterpenoids
Bicyclo[3.1.1]heptan-3-ol, 6,6-dimethyl-2-methylene-, [1S-(1.α.,3.α.,5.α.)]-	Lipids and lipid-like molecules	Prenol lipids	Monoterpenoids
Naphthalene, 1,2,3,5,6,8a-hexahydro-4,7-dimethyl-1-(1-methylethyl)-, (1S-cis)-	Lipids and lipid-like molecules	Prenol lipids	Sesquiterpenoids
(1R,7S,E)-7-Isopropyl-4,10-dimethylenecyclodec-5-enol	Others	Others	Others
Eudesmol	Others	Others	Others
Terpineol	Lipids and lipid-like molecules	Prenol lipids	Monoterpenoids
(8R,8aS)-8,8a-Dimethyl-2-(propan-2-ylidene)-1,2,3,7,8,8a-hexahydronaphthalene	Others	Others	Others
1H-Benzocycloheptene, 2,4a,5,6,7,8,9,9a-octahydro-3,5,5-trimethyl-9-methylene-, (4aS-cis)-	Lipids and lipid-like molecules	Prenol lipids	Sesquiterpenoids
Bicyclo[2.2.1]heptan-2-ol, 1,7,7-trimethyl-, (1S-endo)-	Lipids and lipid-like molecules	Prenol lipids	Monoterpenoids
(5S,6R,7S,10R)-7-Isopropyl-2,10-dimethylspiro[4.5]dec-1-en-6-ol	Others	Others	Others
2-Naphthalenemethanol, 1,2,3,4,4a,5,6,8a-octahydro-.α.,.α.,4a,8-tetramethyl-, (2.α.,4a.α.,8a.α.)-	Others	Others	Others
3-Cyclohexen-1-ol, 1-(1,5-dimethyl-4-hexenyl)-4-methyl-	Lipids and lipid-like molecules	Prenol lipids	Sesquiterpenoids
Phenol, 2,2'-methylenebis[6-(1,1-dimethylethyl)-4-methyl-	Others	Others	Others
endo-Borneol	Lipids and lipid-like molecules	Prenol lipids	Monoterpenoids

## Sheet: Table S6
Table S6. Compounds of VOCs from Phoebe zhennan wood
No.	Compound name	Subclass	Relative contents (%)
			10a		30a		80a
			mean	range	mean	range	mean	range
1	Cubebene	Sesquiterpenoids	0.0858236	0.00-0.22	0.206524	0.00-0.38	0.0201978	0.00-0.03
2	Benzene, 1-(1,5-dimethyl-4-hexenyl)-4-methyl-	Others	0.429969	0.00-0.76	0.53785	0.00-0.83	0.206098	0.11-0.3
3	(3R,3aR,3bR,4S,7R,7aR)-4-Isopropyl-3,7-dimethyloctahydro-1H-cyclopenta[1,3]cyclopropa[1,2]benzen-3-ol	Others	1.11885	0.96-1.33	2.25003	1.91-2.86	0.322481	0.3-0.38
4	Elemol	Sesquiterpenoids	3.35606	3.20-3.55	5.50582	4.97-6.01	2.77171	2.65-2.88
5	1H-Cycloprop[e]azulen-4-ol, decahydro-1,1,4,7-tetramethyl-, [1aR-(1a.α.,4.β.,4a.β.,7.α.,7a.β.,7b.α.)]-	Others	0.848356	0.00-1.62	0	0.00-0.00	0	0.00-0.00
6	Humulene epoxide II	Others	1.65253	1.24-1.99	1.38889	0.00-2.11	0.101017	0.00-0.51
7	Guaiol	Sesquiterpenoids	4.49184	3.35-4.89	5.74368	5.50-6.34	2.27133	2.15-2.38
8	Uncineol	Others	4.96947	3.66-5.62	5.50747	5.17-6.71	6.34906	6.03-6.64
9	Amorphene	Others	2.30633	1.45-2.72	1.00348	0.00-1.49	1.51205	1.34-1.65
10	Agarospirol	Others	37.8671	35.31-40.52	36.8148	32.47-45.86	30.6848	29.38-31.69
11	Eudesmol	Sesquiterpenoids	30.9557	28.89-32.79	24.0154	20.88-29.7	25.4285	25-25.81
12	Cadalene	Others	2.51745	1.53-3.51	0.184612	0.00-0.92	0.534444	0.36-0.65
13	Longiverbenone	Others	6.57112	5.69-7.15	2.27152	0.00-3.01	0.236606	0.00-1.18
14	Copaene	Sesquiterpenoids	0.108411	0.00-0.24	0.206524	0.00-0.38	0	0.00-0.00
15	(3S,3aR,3bR,4S,7R,7aR)-4-Isopropyl-3,7-dimethyloctahydro-1H-cyclopenta[1,3]cyclopropa[1,2]benzen-3-ol	Others	1.11885	0.96-1.33	2.25003	1.91-2.86	0.322481	0.3-0.38
16	(1R,2S,6S,7S,8S)-8-Isopropyl-1-methyl-3-methylenetricyclo[4.4.0.02,7]decane-rel-	Others	0.0467803	0.00-0.13	0.268474	0.00-0.5	0.0511084	0.04-0.06
17	(1R,3aS,8aS)-7-Isopropyl-1,4-dimethyl-1,2,3,3a,6,8a-hexahydroazulene	Others	0.0176819	0.00-0.09	0.135939	0.00-0.21	0.0534624	0.04-0.06
18	(1aR,4S,4aR,7R,7aS,7bS)-1,1,4,7-Tetramethyldecahydro-1H-cyclopropa[e]azulen-4-ol	Others	0.603312	0.00-1.81	0	0.00-0.00	0	0.00-0.00
19	1H-Cyclopenta[1,3]cyclopropa[1,2]benzene, octahydro-7-methyl-3-methylene-4-(1-methylethyl)-, [3aS-(3a.α.,3b.β.,4.β.,7.α.,7aS*)]-	Others	0.0467803	0.00-0.13	0.268474	0.00-0.5	0.0264633	0.00-0.05
20	Tricyclo[4.4.0.0(2,7)]dec-3-ene-3-methanol, 1-methyl-8-(1-methylethyl)-	Others	0.887589	0.00-4.44	0.50704	0.00-2.54	0	0.00-0.00
21	Verbenol	Monoterpenoids	0	0.00-0.00	1.16242	0.89-1.35	0.0876219	0.08-0.1
22	Bicyclo[3.1.1]hept-3-en-2-one, 4,6,6-trimethyl-	Others	0	0.00-0.00	0.398901	0.31-0.45	0.0211408	0.00-0.04
23	Myrtenol	Others	0	0.00-0.00	0.265795	0.00-0.38	0.0322218	0.00-0.05
24	Bicyclo[3.1.1]hept-3-en-2-one, 4,6,6-trimethyl-, (1S)-	Others	0	0.00-0.00	0.398901	0.31-0.45	0.0322434	0.00-0.06
25	1-((1R,2R,3R)-2-(3-Isopropylfuran-2-yl)-3-methylcyclopentyl)ethanone	Others	0	0.00-0.00	0.893997	0.00-1.32	0	0.00-0.00
26	Tricyclo[5.2.2.0(1,6)]undecan-3-ol, 2-methylene-6,8,8-trimethyl-	Others	0	0.00-0.00	0.36779	0.00-1.84	0	0.00-0.00
27	Caryophyllene oxide	Sesquiterpenoids	0	0.00-0.00	3.64551	0.00-4.87	0	0.00-0.00
28	δ-Cadinene	Sesquiterpenoids	0	0.00-0.00	1.56707	0.00-4.49	1.66942	1.50-1.86
29	(1R,7S,E)-7-Isopropyl-4,10-dimethylenecyclodec-5-enol	Others	0	0.00-0.00	1.34195	0.00-2.54	0	0.00-0.00
30	(5S,6R,7S,10R)-7-Isopropyl-2,10-dimethylspiro[4.5]dec-1-en-6-ol	Others	0	0.00-0.00	0	0.00-0.00	0.283967	0.00-0.74
31	2-Naphthalenemethanol, 1,2,3,4,4a,5,6,8a-octahydro-.α.,.α.,4a,8-tetramethyl-, (2.α.,4a.α.,8a.α.)-	Others	0	0.00-0.00	0	0.00-0.00	0.603529	0.53-0.75
32	3-Cyclohexen-1-ol, 1-(1,5-dimethyl-4-hexenyl)-4-methyl-	Sesquiterpenoids	0	0.00-0.00	0	0.00-0.00	0.763623	0.00-1.07
Only compounds with more than 0.2% of total area were listed

## Sheet: Table S7
Table S7. Potential significant differential metabolites of essential oil from LC-MS and GC-MS among three tree ages
Determined method	Comparison group	Metabolites	VIP	Superclass	Class	Subclass
LC-MS	10a vs. 30a	5-Aminopentanoic acid	10.1944	Organic acids and derivatives	Carboxylic acids and derivatives	Amino acids, peptides, and analogues
		Carvone	9.64183	Lipids and lipid-like molecules	Prenol lipids	Monoterpenoids
		Diethylpropion	7.10916	Organic oxygen compounds	Organooxygen compounds	Carbonyl compounds
		Caryophyllene alpha-oxide	5.29059	Lipids and lipid-like molecules	Prenol lipids	Sesquiterpenoids
		Nootkatol	5.14257	Hydrocarbon derivatives	Organooxygen compounds	Alcohols and polyols
		L-Homoserine	4.48311	Organic acids and derivatives	Carboxylic acids and derivatives	Amino acids, peptides, and analogues
		Perillic acid	4.14886	Lipids and lipid-like molecules	Prenol lipids	Monoterpenoids
		Medroxyprogesterone	3.9637	Lipids and lipid-like molecules	Steroids and steroid derivatives	Pregnane steroids
		beta-Santalol	3.87579	Hydrocarbon derivatives	Fatty Acyls	Alcohols and polyols
		Confertifolin	3.7576	Others	Others	Others
		Xanthoxic acid	3.69144	Others	Others	Others
		Abscisic alcohol	3.58081	Others	Others	Others
		Alantolactone	3.2883	Organoheterocyclic compounds	Naphthofurans	Others
		Cyromazine	3.28347	Organoheterocyclic compounds	Triazines	Aminotriazines
		Alanyl-L-lysine	2.95111	Organic acids and derivatives	Peptidomimetics	Hybrid peptides
		Norselegiline	2.92657	Others	Others	Others
		Ureidosuccinic acid	2.87617	Hydrocarbon derivatives	Carboximidic acids and derivatives	Amino acids, peptides, and analogues
		Mexiletine	2.6907	Benzenoids	Phenol ethers	Others
		Cuminaldehyde	2.43425	Lipids and lipid-like molecules	Prenol lipids	Monoterpenoids
		4-Hydroxystyrene	2.35441	Benzenoids	Benzene and substituted derivatives	Styrenes
		Xanthoxin	2.1524	Others	Others	Others
		Limonene-1,2-diol	2.15087	Others	Others	Others
		Caproic acid	2.14693	Lipids and lipid-like molecules	Fatty Acyls	Fatty acids and conjugates
		Cubebene	2.12571	Lipids and lipid-like molecules	Prenol lipids	Sesquiterpenoids
		4-Methylbenzyl alcohol	2.11385	Benzenoids	Benzene and substituted derivatives	Benzyl alcohols
		Matricarin	1.90385	Lipids and lipid-like molecules	Prenol lipids	Terpene lactones
		L-Tryptophan	1.71775	Organoheterocyclic compounds	Indoles and derivatives	Indolyl carboxylic acids and derivatives
		Guanidoacetic acid	1.70592	Organic acids and derivatives	Carboxylic acids and derivatives	Amino acids, peptides, and analogues
		N,N-Diethyl-m-toluamide	1.64864	Others	Pesticides/Herbicides	Others
		N(6)-Methyllysine	1.60965	Organic acids and derivatives	Carboxylic acids and derivatives	Amino acids, peptides, and analogues
		(1S,2R,4S)-(-)-Bornyl acetate	1.6079	Others	Others	Others
		Scopoletin	1.58973	Phenylpropanoids and polyketides	Coumarins and derivatives	Hydroxycoumarins
		Selinene	1.42988	Lipids and lipid-like molecules	Prenol lipids	Sesquiterpenoids
		Abscisic acid	1.29916	Lipids and lipid-like molecules	Prenol lipids	Sesquiterpenoids
		Methyldopa	1.29882	Phenylpropanoids and polyketides	Phenylpropanoic acids	Others
		Tetrahydrocannabinol	1.29205	Organoheterocyclic compounds	Benzopyrans	1-benzopyrans
		11b-Hydroxyandrost-4-ene-3,17-dione	1.28681	Lipids and lipid-like molecules	Steroids and steroid derivatives	Androstane steroids
		Caryophyllene	1.23103	Lipids and lipid-like molecules	Prenol lipids	Sesquiterpenoids
		Quadrone	1.16734	Others	Others	Others
		Physostigmine	1.15182	Organoheterocyclic compounds	Indoles and derivatives	Pyrroloindoles
		5-Hydroxyindoleacetic acid	1.14354	Organoheterocyclic compounds	Indoles and derivatives	Indolyl carboxylic acids and derivatives
		3-tert-Butyl-5-methylcatechol	1.13432	Others	Others	Others
		Hinesol	1.11918	Others	Others	Others
		Gentisic acid	1.11413	Benzenoids	Benzene and substituted derivatives	Benzoic acids and derivatives
		2,6-Dimethyl-naphtalene	1.106	Benzenoids	Naphthalenes	Others
		L-2,4-diaminobutyric acid	1.09707	Organic acids and derivatives	Carboxylic acids and derivatives	Amino acids, peptides, and analogues
		Arachidic acid	1.07819	Lipids and lipid-like molecules	Fatty Acyls	Fatty acids and conjugates
		Zerumbone	1.0729	Lipids and lipid-like molecules	Prenol lipids	Sesquiterpenoids
		Lubimin	1.02736	Hydrocarbon derivatives	Organic oxides	Alcohols and polyols
		3-Methyladenine	1.01408	Organoheterocyclic compounds	Imidazopyrimidines	Purines and purine derivatives
		M346T539	1.00628	Others	Others	Others
		Adrenic acid	1.00081	Lipids and lipid-like molecules	Fatty Acyls	Fatty acids and conjugates
	10a vs. 80a	5-Aminopentanoic acid	14.0012	Organic acids and derivatives	Carboxylic acids and derivatives	Amino acids, peptides, and analogues
		L-Homoserine	8.08791	Organic acids and derivatives	Carboxylic acids and derivatives	Amino acids, peptides, and analogues
		Cubebene	7.81583	Lipids and lipid-like molecules	Prenol lipids	Sesquiterpenoids
		Limonene-1,2-diol	5.08985	Others	Others	Others
		Caryophyllene alpha-oxide	4.38235	Lipids and lipid-like molecules	Prenol lipids	Sesquiterpenoids
		Carvone	4.16607	Lipids and lipid-like molecules	Prenol lipids	Monoterpenoids
		Xanthoxic acid	4.02336	Others	Others	Others
		Diethylpropion	3.73454	Organic oxygen compounds	Organooxygen compounds	Carbonyl compounds
		Abscisic alcohol	3.27952	Others	Others	Others
		beta-Selinene	3.26733	Lipids and lipid-like molecules	Prenol lipids	Sesquiterpenoids
		beta-Santalol	3.2207	Hydrocarbon derivatives	Fatty Acyls	Alcohols and polyols
		Phenyl acetate	2.81855	Others	Others	Others
		beta-Caryophyllene	2.64165	Lipids and lipid-like molecules	Prenol lipids	Sesquiterpenoids
		Scopoletin	2.56732	Phenylpropanoids and polyketides	Coumarins and derivatives	Hydroxycoumarins
		Confertifolin	2.46504	Others	Others	Others
		Caproic acid	2.3895	Lipids and lipid-like molecules	Fatty Acyls	Fatty acids and conjugates
		Nootkatol	2.37808	Hydrocarbon derivatives	Organooxygen compounds	Alcohols and polyols
		Xanthoxin	2.20636	Others	Others	Others
		9,12,13-TriHOME	2.15047	Hydrocarbon derivatives	Carboxylic acids and derivatives	Alcohols and polyols
		Epsilon-caprolactam	1.85896	Organoheterocyclic compounds	Lactams	Caprolactams
		trans-1,2-Cyclohexanediol	1.77444	Others	Others	Others
		Ureidosuccinic acid	1.74925	Hydrocarbon derivatives	Carboximidic acids and derivatives	Amino acids, peptides, and analogues
		L-Tryptophan	1.66031	Organoheterocyclic compounds	Indoles and derivatives	Indolyl carboxylic acids and derivatives
		Capsidiol	1.6523	Lipids and lipid-like molecules	Prenol lipids	Sesquiterpenoids
		Methyldopa	1.52802	Phenylpropanoids and polyketides	Phenylpropanoic acids	Others
		Polygodial	1.46626	Others	Endogenous Metabolites	Others
		Norselegiline	1.4613	Others	Others	Others
		4-Hydroxystyrene	1.40221	Benzenoids	Benzene and substituted derivatives	Styrenes
		Dodecanoic acid	1.35702	Lipids and lipid-like molecules	Fatty Acyls	Fatty acids and conjugates
		N-Alpha-acetyllysine	1.2804	Organic acids and derivatives	Carboxylic acids and derivatives	Amino acids, peptides, and analogues
		Iminoarginine	1.23886	Others	Others	Others
		(3S,5S)-3,5-Diaminohexanoate	1.20679	Organic acids and derivatives	Carboxylic acids and derivatives	Amino acids, peptides, and analogues
		Diisobutyl phthalate	1.18924	Benzenoids	Benzene and substituted derivatives	Benzoic acids and derivatives
		Triethylamine	1.16996	Organonitrogen compounds	Amines	Tertiary amines
		Alantolactone	1.16282	Organoheterocyclic compounds	Naphthofurans	Others
		Abscisic acid	1.16106	Lipids and lipid-like molecules	Prenol lipids	Sesquiterpenoids
		Nootkatone	1.14922	Lipids and lipid-like molecules	Prenol lipids	Sesquiterpenoids
		Deoxyuridine	1.12431	Nucleosides, nucleotides, and analogues	Pyrimidine nucleosides	Pyrimidine 2'-deoxyribonucleosides
		Quadrone	1.08814	Others	Others	Others
		Juvenile hormone III	1.07963	Others	Others	Others
		5-Hydroxyindoleacetic acid	1.07195	Organoheterocyclic compounds	Indoles and derivatives	Indolyl carboxylic acids and derivatives
		11b-Hydroxyandrost-4-ene-3,17-dione	1.06955	Lipids and lipid-like molecules	Steroids and steroid derivatives	Androstane steroids
		3-tert-Butyl-5-methylcatechol	1.0664	Others	Others	Others
		4-Acetamido-2-aminobutanoic acid	1.0656	Hydrocarbon derivatives	Carboxylic acids and derivatives	Amines
		Stearic acid	1.06218	Lipids and lipid-like molecules	Fatty Acyls	Fatty acids and conjugates
		L-2,4-diaminobutyric acid	1.04858	Organic acids and derivatives	Carboxylic acids and derivatives	Amino acids, peptides, and analogues
		2-Propylpiperidine	1.04856	Alkaloids and derivatives	Others	Others
		Lubimin	1.03333	Hydrocarbon derivatives	Organic oxides	Alcohols and polyols
		2,6-Dimethyl-naphtalene	1.02399	Benzenoids	Naphthalenes	Others
		Alanyl-L-lysine	1.02312	Organic acids and derivatives	Peptidomimetics	Hybrid peptides
		Palmitic acid	1.00819	Lipids and lipid-like molecules	Fatty Acyls	Fatty acids and conjugates
	30a vs. 80a	5-Aminopentanoic acid	9.48761	Organic acids and derivatives	Carboxylic acids and derivatives	Amino acids, peptides, and analogues
		Carvone	8.31327	Lipids and lipid-like molecules	Prenol lipids	Monoterpenoids
		L-Homoserine	7.98324	Organic acids and derivatives	Carboxylic acids and derivatives	Amino acids, peptides, and analogues
		Cubebene	6.54467	Lipids and lipid-like molecules	Prenol lipids	Sesquiterpenoids
		Diethylpropion	6.40641	Organic oxygen compounds	Organooxygen compounds	Carbonyl compounds
		Caryophyllene alpha-oxide	5.65603	Lipids and lipid-like molecules	Prenol lipids	Sesquiterpenoids
		Nootkatol	4.58956	Hydrocarbon derivatives	Organooxygen compounds	Alcohols and polyols
		Santalol	4.14881	Hydrocarbon derivatives	Fatty Acyls	Alcohols and polyols
		Limonene-1,2-diol	4.13186	Others	Others	Others
		Confertifolin	3.63566	Others	Others	Others
		Perillic acid	3.26878	Lipids and lipid-like molecules	Prenol lipids	Monoterpenoids
		Medroxyprogesterone	2.80975	Lipids and lipid-like molecules	Steroids and steroid derivatives	Pregnane steroids
		Alantolactone	2.75386	Organoheterocyclic compounds	Naphthofurans	Others
		Ureidosuccinic acid	2.71265	Hydrocarbon derivatives	Carboximidic acids and derivatives	Amino acids, peptides, and analogues
		Caproic acid	2.70359	Lipids and lipid-like molecules	Fatty Acyls	Fatty acids and conjugates
		Cyromazine	2.61614	Organoheterocyclic compounds	Triazines	Aminotriazines
		Norselegiline	2.60538	Others	Others	Others
		beta-Selinene	2.59217	Lipids and lipid-like molecules	Prenol lipids	Sesquiterpenoids
		Xanthoxin	2.5819	Others	Others	Others
		Alanyl-L-lysine	2.45042	Organic acids and derivatives	Peptidomimetics	Hybrid peptides
		Phenyl acetate	2.32642	Others	Others	Others
		4-Hydroxystyrene	2.20418	Benzenoids	Benzene and substituted derivatives	Styrenes
		Mexiletine	2.19948	Benzenoids	Phenol ethers	Others
		Xanthoxic acid	2.16224	Others	Others	Others
		Caryophyllene	2.12032	Lipids and lipid-like molecules	Prenol lipids	Sesquiterpenoids
		Cuminaldehyde	2.01469	Lipids and lipid-like molecules	Prenol lipids	Monoterpenoids
		9,12,13-TriHOME	1.92425	Hydrocarbon derivatives	Carboxylic acids and derivatives	Alcohols and polyols
		Scopoletin	1.89694	Phenylpropanoids and polyketides	Coumarins and derivatives	Hydroxycoumarins
		Guanidoacetic acid	1.70094	Organic acids and derivatives	Carboxylic acids and derivatives	Amino acids, peptides, and analogues
		4-Methylbenzyl alcohol	1.63409	Benzenoids	Benzene and substituted derivatives	Benzyl alcohols
		Epsilon-caprolactam	1.58449	Organoheterocyclic compounds	Lactams	Caprolactams
		Capsidiol	1.56428	Lipids and lipid-like molecules	Prenol lipids	Sesquiterpenoids
		1,2-Cyclohexanediol	1.53785	Others	Others	Others
		Polygodial	1.51157	Others	Endogenous Metabolites	Others
		Matricarin	1.47008	Lipids and lipid-like molecules	Prenol lipids	Terpene lactones
		Abscisic acid	1.44142	Lipids and lipid-like molecules	Prenol lipids	Sesquiterpenoids
		Dodecanoic acid	1.36559	Lipids and lipid-like molecules	Fatty Acyls	Fatty acids and conjugates
		(1S,2R,4S)-(-)-Bornyl acetate	1.3585	Others	Others	Others
		N,N-Diethyl-m-toluamide	1.33346	Others	Pesticides/Herbicides	Others
		N(6)-Methyllysine	1.31852	Organic acids and derivatives	Carboxylic acids and derivatives	Amino acids, peptides, and analogues
		Diisobutyl phthalate	1.25492	Benzenoids	Benzene and substituted derivatives	Benzoic acids and derivatives
		(3S,5S)-3,5-Diaminohexanoate	1.10288	Organic acids and derivatives	Carboxylic acids and derivatives	Amino acids, peptides, and analogues
		Nootkatone	1.09071	Lipids and lipid-like molecules	Prenol lipids	Sesquiterpenoids
		Beta-Leucine	1.06434	Organic acids and derivatives	Carboxylic acids and derivatives	Amino acids, peptides, and analogues
		Arachidic acid	1.06225	Lipids and lipid-like molecules	Fatty Acyls	Fatty acids and conjugates
		Hinesol	1.06139	Others	Others	Others
		Juvenile hormone III	1.06136	Others	Others	Others
		Adrenic acid	1.0492	Lipids and lipid-like molecules	Fatty Acyls	Fatty acids and conjugates
		Tetrahydrocannabinol	1.02968	Organoheterocyclic compounds	Benzopyrans	1-benzopyrans
GC-MS	10a vs. 30a	(3R,3aR,3bR,4S,7R,7aR)-4-Isopropyl-3,7-dimethyloctahydro-1H-cyclopenta[1,3]cyclopropa[1,2]benzen-3-ol	4.39398	Others	Others	Others
		Naphthalene, 1,6-dimethyl-4-(1-methylethyl)-	2.64645	Others	Others	Others
		2-((2S,4aR)-4a,8-Dimethyl-1,2,3,4,4a,5,6,7-octahydronaphthalen-2-yl)propan-2-ol	2.58606	Others	Others	Others
		Naphthalene, 1,2,3,5,6,8a-hexahydro-4,7-dimethyl-1-(1-methylethyl)-, (1S-cis)-	2.08027	Lipids and lipid-like molecules	Prenol lipids	Sesquiterpenoids
		8-Isopropyl-1,5-dimethyltricyclo[4.4.0.02,7]dec-4-en-3-one	1.63409	Lipids and lipid-like molecules	Prenol lipids	Sesquiterpenoids
		(1R,7S,E)-7-Isopropyl-4,10-dimethylenecyclodec-5-enol	1.50945	Others	Others	Others
		Azulene, 1,2,3,5,6,7,8,8a-octahydro-1,4-dimethyl-7-(1-methylethenyl)-, [1S-(1.alpha.,7.alpha.,8a.beta.)]-	1.41892	Lipids and lipid-like molecules	Prenol lipids	Sesquiterpenoids
		Guaiol	1.34652	Lipids and lipid-like molecules	Prenol lipids	Sesquiterpenoids
		Eudesmol	1.32465	Others	Others	Others
	10a vs. 80a	Guaiol	2.80018	Lipids and lipid-like molecules	Prenol lipids	Sesquiterpenoids
		Agarospirol	2.76987	Lipids and lipid-like molecules	Prenol lipids	Sesquiterpenoids
		2-((2R,8R,8aS)-8,8a-Dimethyl-1,2,3,4,6,7,8,8a-octahydronaphthalen-2-yl)propan-2-ol	2.4599	Lipids and lipid-like molecules	Prenol lipids	Sesquiterpenoids
		Naphthalene, 1,6-dimethyl-4-(1-methylethyl)-	2.23809	Others	Others	Others
		(3R,3aR,3bR,4S,7R,7aR)-4-Isopropyl-3,7-dimethyloctahydro-1H-cyclopenta[1,3]cyclopropa[1,2]benzen-3-ol	2.2361	Others	Others	Others
		Naphthalene, 1,2,3,5,6,8a-hexahydro-4,7-dimethyl-1-(1-methylethyl)-, (1S-cis)-	2.12076	Lipids and lipid-like molecules	Prenol lipids	Sesquiterpenoids
		8-Isopropyl-1,5-dimethyltricyclo[4.4.0.02,7]dec-4-en-3-one	1.68248	Lipids and lipid-like molecules	Prenol lipids	Sesquiterpenoids
		(1R,7S,E)-7-Isopropyl-4,10-dimethylenecyclodec-5-enol	1.49987	Others	Others	Others
		5-Azulenemethanol, 1,2,3,4,5,6,7,8-octahydro-.alpha.,.alpha.,3,8-tetramethyl-, acetate, [3S-(3.alpha.,5.alpha.,8.alpha.)]-	1.25725	Lipids and lipid-like molecules	Prenol lipids	Sesquiterpenoids
	30a vs. 80a	Guaiol	3.3437	Lipids and lipid-like molecules	Prenol lipids	Sesquiterpenoids
		2-((2R,8R,8aS)-8,8a-Dimethyl-1,2,3,4,6,7,8,8a-octahydronaphthalen-2-yl)propan-2-ol	2.75693	Lipids and lipid-like molecules	Prenol lipids	Sesquiterpenoids
		Agarospirol	2.64046	Lipids and lipid-like molecules	Prenol lipids	Sesquiterpenoids
		Eudesmol	2.13772	Others	Others	Others
		5-Azulenemethanol, 1,2,3,4,5,6,7,8-octahydro-.alpha.,.alpha.,3,8-tetramethyl-, acetate, [3S-(3.alpha.,5.alpha.,8.alpha.)]-	1.82153	Lipids and lipid-like molecules	Prenol lipids	Sesquiterpenoids
		2-((2S,4aR)-4a,8-Dimethyl-1,2,3,4,4a,5,6,7-octahydronaphthalen-2-yl)propan-2-ol	1.8187	Others	Others	Others

## Sheet: Table S8
Table S8. Potential significant differential metabolites of volatile organic compounds among three tree ages
Determined method	Comparison group	Metabolites	VIP	Superclass	Class	Subclass
GC-MS	10a vs. 30a	Caryophyllene oxide	2.2071	Lipids and lipid-like molecules	Prenol lipids	Sesquiterpenoids
		Naphthalene, 1,6-dimethyl-4-(1-methylethyl)-	1.62036	Others	Others	Others
		Longiverbenone	1.5263	Lipids and lipid-like molecules	Prenol lipids	Sesquiterpenoids
		Cyclohexanemethanol, 4-ethenyl-.alpha.,.alpha.,4-trimethyl-3-(1-methylethenyl)-, [1R-(1.alpha.,3.alpha.,4.beta.)]-	1.4678	Lipids and lipid-like molecules	Prenol lipids	Sesquiterpenoids
		(1R,7S,E)-7-Isopropyl-4,10-dimethylenecyclodec-5-enol	1.22064	Others	Others	Others
		Verbenol	1.16414	Lipids and lipid-like molecules	Prenol lipids	Monoterpenoids
		(3R,3aR,3bR,4S,7R,7aR)-4-Isopropyl-3,7-dimethyloctahydro-1H-cyclopenta[1,3]cyclopropa[1,2]benzen-3-ol	1.13053	Others	Others	Others
		(3S,3aR,3bR,4S,7R,7aR)-4-Isopropyl-3,7-dimethyloctahydro-1H-cyclopenta[1,3]cyclopropa[1,2]benzen-3-ol	1.13053	Others	Others	Others
		1-((1R,2R,3R)-2-(3-Isopropylfuran-2-yl)-3-methylcyclopentyl)ethanone	1.09428	Others	Others	Others
	10a vs. 80a	Agarospirol	3.07148	Others	Others	Others
		2-((2R,8R,8aS)-8,8a-Dimethyl-1,2,3,4,6,7,8,8a-octahydronaphthalen-2-yl)propan-2-ol	2.80208	Lipids and lipid-like molecules	Prenol lipids	Sesquiterpenoids
		2-Naphthalenemethanol, 1,2,3,4,4a,5,6,7-octahydro-.alpha.,.alpha.,4a,8-tetramethyl-, (2R-cis)-	1.48025	Others	Others	Others
	30a vs. 80a	Agarospirol	2.96112	Lipids and lipid-like molecules	Prenol lipids	Sesquiterpenoids
		2-((2R,8R,8aS)-8,8a-Dimethyl-1,2,3,4,6,7,8,8a-octahydronaphthalen-2-yl)propan-2-ol	2.87644	Lipids and lipid-like molecules	Prenol lipids	Sesquiterpenoids
		2-Naphthalenemethanol, 1,2,3,4,4a,5,6,7-octahydro-.alpha.,.alpha.,4a,8-tetramethyl-, (2R-cis)-	1.44337	Others	Others	Others

## Sheet: Table S9
Table S9. Basic information of significant differential metabolites
Determined method	Type	Metabolites	Subclass	Class	Superclass	Areas
						10a	30a	80a
LC-MS	Essential oil	beta-Alanyl-L-lysine	Hybrid peptides	Peptidomimetics	Organic acids and derivatives	1.65741e+08	7.04331e+08	7.89317e+07
		Cuminaldehyde	Monoterpenoids	Prenol lipids	Lipids and lipid-like molecules	5.8837e+07	4.24551e+08	2.22711e+06
		N,N-Diethyl-m-toluamide	Others	Pesticides/Herbicides	Others	3.27427e+07	2.01803e+08	1.59511e+07
		Arachidic acid	Fatty acids and conjugates	Fatty Acyls	Lipids and lipid-like molecules	4.83394e+07	1.20612e+08	3.19176e+06
		Norselegiline	Others	Others	Others	1.75954e+08	7.10292e+08	483482
		Alantolactone	Others	Naphthofurans	Organoheterocyclic compounds	4.46589e+08	1.11878e+09	3.2555e+08
		Ureidosuccinic acid	Amino acids, peptides, and analogues	Carboximidic acids and derivatives	Hydrocarbon derivatives	2.57149e+08	7.7584e+08	6.296e+06
		L-2,4-diaminobutyric acid	Amino acids, peptides, and analogues	Carboxylic acids and derivatives	Organic acids and derivatives	2.15146e+07	9.65347e+07	1.1328e+08
		Confertifolin	Others	Others	Others	5.60043e+08	1.43742e+09	6.17422e+07
		Carvone	Monoterpenoids	Prenol lipids	Lipids and lipid-like molecules	1.42598e+09	7.2062e+09	2.97786e+06
		3-Methyladenine	Purines and purine derivatives	Imidazopyrimidines	Organoheterocyclic compounds	2.40033e+07	8.82309e+07	311127
		Adrenic acid	Fatty acids and conjugates	Fatty Acyls	Lipids and lipid-like molecules	5.33735e+07	1.15849e+08	1.30895e+06
		N(6)-Methyllysine	Amino acids, peptides, and analogues	Carboxylic acids and derivatives	Organic acids and derivatives	3.15559e+07	1.92722e+08	1.10837e+07
		Perillic acid	Monoterpenoids	Prenol lipids	Lipids and lipid-like molecules	5.0658e+07	1.11909e+09	1.77375e+06
		Tetrahydrocannabinol	1-benzopyrans	Benzopyrans	Organoheterocyclic compounds	1.13245e+07	1.15036e+08	4.11048e+06
		Diethylpropion	Carbonyl compounds	Organooxygen compounds	Organic oxygen compounds	1.17638e+09	4.30236e+09	3.20069e+07
		(1S,2R,4S)-(-)-Bornyl acetate	Others	Others	Others	9.0732e+07	2.5242e+08	5.92862e+07
		Physostigmine	Pyrroloindoles	Indoles and derivatives	Organoheterocyclic compounds	1.3756e+07	9.62703e+07	5.93965e+07
		Mexiletine	Others	Phenol ethers	Benzenoids	5.62754e+07	5.06032e+08	1.01449e+06
		4-Methylbenzyl alcohol	Benzyl alcohols	Benzene and substituted derivatives	Benzenoids	8.291e+06	2.85122e+08	6.35663e+06
		Cyromazine	Aminotriazines	Triazines	Organoheterocyclic compounds	4.94556e+07	7.14354e+08	2.24904e+06
		4-Hydroxystyrene	Styrenes	Benzene and substituted derivatives	Benzenoids	1.67558e+08	5.13513e+08	6.36132e+06
		L-Homoserine	Amino acids, peptides, and analogues	Carboxylic acids and derivatives	Organic acids and derivatives	1.4946e+09	2.58401e+08	6.96003e+09
		2,6-Dimethyl-naphtalene	Others	Naphthalenes	Benzenoids	8.85862e+07	1.34015e+07	2.62262e+06
		Quadrone	Others	Others	Others	1.0644e+08	2.24023e+07	8.91259e+06
		Lubimin	Alcohols and polyols	Organic oxides	Hydrocarbon derivatives	9.46419e+07	2.93732e+07	6.87032e+06
		5-Hydroxyindoleacetic acid	Indolyl carboxylic acids and derivatives	Indoles and derivatives	Organoheterocyclic compounds	1.00922e+08	2.05787e+07	6.70938e+06
		Xanthoxic acid	Others	Others	Others	1.44495e+09	6.06537e+08	1.17671e+08
		L-Tryptophan	Indolyl carboxylic acids and derivatives	Indoles and derivatives	Organoheterocyclic compounds	2.29683e+08	4.75696e+07	3.15527e+06
		Abscisic alcohol	Others	Others	Others	8.94904e+08	1.07192e+08	1.31864e+07
		3-tert-Butyl-5-methylcatechol	Others	Others	Others	1.12458e+08	3.32974e+07	1.91598e+07
		Medroxyprogesterone	Pregnane steroids	Steroids and steroid derivatives	Lipids and lipid-like molecules	1.37038e+09	3.99278e+08	1242156789
		11b-Hydroxyandrost-4-ene-3,17-dione	Androstane steroids	Steroids and steroid derivatives	Lipids and lipid-like molecules	1.10737e+08	8.64997e+06	1.64559e+07
		Zerumbone	Sesquiterpenoids	Prenol lipids	Lipids and lipid-like molecules	9.72056e+07	2.63416e+07	6.42345e+07
		Triethylamine	Tertiary amines	Amines	Organonitrogen compounds	2.53537e+07	6.71539e+07	1.39513e+08
		Stearic acid	Fatty acids and conjugates	Fatty Acyls	Lipids and lipid-like molecules	1.42438e+07	2.10162e+07	1.08143e+08
		beta-Caryophyllene	Sesquiterpenoids	Prenol lipids	Lipids and lipid-like molecules	3.10437e+08	4.11359e+08	8.98892e+08
		Dodecanoic acid	Fatty acids and conjugates	Fatty Acyls	Lipids and lipid-like molecules	6.81156e+07	2.61561e+07	2.22765e+08
		Diisobutyl phthalate	Benzoic acids and derivatives	Benzene and substituted derivatives	Benzenoids	7.01581e+07	2.34517e+07	1.89525e+08
		Deoxyuridine	Pyrimidine 2'-deoxyribonucleosides	Pyrimidine nucleosides	Nucleosides, nucleotides, and analogues	1.69987e+07	1.76815e+07	1.22287e+08
		beta-Selinene	Sesquiterpenoids	Prenol lipids	Lipids and lipid-like molecules	1.54105e+09	1.37157e+09	6.58903e+08
		Capsidiol	Sesquiterpenoids	Prenol lipids	Lipids and lipid-like molecules	2.53999e+08	2.84945e+08	3.01044e+07
		Phenyl acetate	Others	Others	Others	7.91602e+08	7.06427e+08	1.3796e+08
		Caproic acid	Fatty acids and conjugates	Fatty Acyls	Lipids and lipid-like molecules	4.68929e+08	7.6135e+08	854019
		beta-Santalol	Alcohols and polyols	Fatty Acyls	Hydrocarbon derivatives	1.01728e+09	1.95849e+09	1.66328e+08
		(3S,5S)-3,5-Diaminohexanoate	Amino acids, peptides, and analogues	Carboxylic acids and derivatives	Organic acids and derivatives	1.43484e+08	1.50412e+08	2.34698e+07
		Palmitic acid	Fatty acids and conjugates	Fatty Acyls	Lipids and lipid-like molecules	9.17355e+07	6.99898e+07	8.17336e+06
		Juvenile hormone III	Others	Others	Others	1.08573e+08	1.30691e+08	1.29024e+07
		Xanthoxin	Others	Others	Others	4.12575e+08	7.08576e+08	1.34797e+07
		4-Acetamido-2-aminobutanoic acid	Amines	Carboxylic acids and derivatives	Hydrocarbon derivatives	9.85438e+07	5.25488e+07	5.44711e+06
		Caryophyllene alpha-oxide	Sesquiterpenoids	Prenol lipids	Lipids and lipid-like molecules	1.9842e+09	3.73984e+09	4.08014e+08
		9,12,13-TriHOME	Alcohols and polyols	Carboxylic acids and derivatives	Hydrocarbon derivatives	4.05244e+08	4.12035e+08	2.60799e+07
		Scopoletin	Hydroxycoumarins	Coumarins and derivatives	Phenylpropanoids and polyketides	6.34447e+08	4.69184e+08	9.12432e+07
		Iminoarginine	Others	Others	Others	1.29863e+08	8.49932e+07	3.92889e+06
		Polygodial	Others	Endogenous Metabolites	Others	2.01713e+08	2.64232e+08	2.49191e+07
		2-Propylpiperidine	Others	Others	Alkaloids and derivatives	1.09682e+08	6.07395e+07	1.90645e+07
		N-Alpha-acetyllysine	Amino acids, peptides, and analogues	Carboxylic acids and derivatives	Organic acids and derivatives	1.37763e+08	9.06776e+07	3.03769e+06
		Epsilon-caprolactam	Caprolactams	Lactams	Organoheterocyclic compounds	2.8689e+08	2.65075e+08	3.34505e+06
		Abscisic acid	Sesquiterpenoids	Prenol lipids	Lipids and lipid-like molecules	1.15259e+08	2.20496e+08	4.29704e+06
		Limonene-1,2-diol	Others	Others	Others	2.12673e+09	1.78326e+09	1.0932e+06
		5-Aminopentanoic acid	Amino acids, peptides, and analogues	Carboxylic acids and derivatives	Organic acids and derivatives	2.3182e+10	1.65801e+10	7.06425e+09
		Beta-Leucine	Amino acids, peptides, and analogues	Carboxylic acids and derivatives	Organic acids and derivatives	1.01461e+08	1.48139e+08	2.99641e+07
		Hinesol	Others	Others	Others	1.37075e+08	2.18649e+08	9.83031e+07
GC-MS	Essential oil	Naphthalene, 1,2,3,5,6,8a-hexahydro-4,7-dimethyl-1-(1-methylethyl)-, (1S-cis)-	Sesquiterpenoids	Prenol lipids	Lipids and lipid-like molecules	5.07262e+07	4.28932e+06	6.26696e+06
		Eudesmol	Others	Others	Others	3.75535e+07	5.43693e+06	6.37066e+07
		Azulene, 1,2,3,5,6,7,8,8a-octahydro-1,4-dimethyl-7-(1-methylethenyl)-, [1S-(1.alpha.,7.alpha.,8a.beta.)]-	Sesquiterpenoids	Prenol lipids	Lipids and lipid-like molecules	1.16155e+07	0	450270
		Naphthalene, 1,6-dimethyl-4-(1-methylethyl)-	Others	Others	Others	3.86003e+07	0	0
		(1R,7S,E)-7-Isopropyl-4,10-dimethylenecyclodec-5-enol	Others	Others	Others	2.17883e+07	0	0
		Guaiol	Sesquiterpenoids	Prenol lipids	Lipids and lipid-like molecules	4.23635e+07	9.14582e+06	1.25697e+08
		2-((2S,4aR)-4a,8-Dimethyl-1,2,3,4,4a,5,6,7-octahydronaphthalen-2-yl)propan-2-ol	Others	Others	Others	4.18213e+07	3.76619e+06	3.83896e+07
		(3R,3aR,3bR,4S,7R,7aR)-4-Isopropyl-3,7-dimethyloctahydro-1H-cyclopenta[1,3]cyclopropa[1,2]benzen-3-ol	Others	Others	Others	1.12982e+08	1.47794e+06	1.19022e+07
		8-Isopropyl-1,5-dimethyltricyclo[4.4.0.02,7]dec-4-en-3-one	Sesquiterpenoids	Prenol lipids	Lipids and lipid-like molecules	3.3371e+07	0	0
		Agarospirol	Sesquiterpenoids	Prenol lipids	Lipids and lipid-like molecules	4.48192e+07	4.22765e+07	1.25697e+08
		2-((2R,8R,8aS)-8,8a-Dimethyl-1,2,3,4,6,7,8,8a-octahydronaphthalen-2-yl)propan-2-ol	Sesquiterpenoids	Prenol lipids	Lipids and lipid-like molecules	4.20113e+07	2.6735e+07	1.11438e+08
		5-Azulenemethanol, 1,2,3,4,5,6,7,8-octahydro-.alpha.,.alpha.,3,8-tetramethyl-, acetate, [3S-(3.alpha.,5.alpha.,8.alpha.)]-	Sesquiterpenoids	Prenol lipids	Lipids and lipid-like molecules	4.20113e+07	2.6735e+07	7.98196e+07
GC-MS	Volatile organic compounds	trans-Verbenol	Monoterpenoids	Prenol lipids	Lipids and lipid-like molecules	0	923425	235156
		(1R,7S,E)-7-Isopropyl-4,10-dimethylenecyclodec-5-enol	Others	Others	Others	0	1.292e+06	0
		1-((1R,2R,3R)-2-(3-Isopropylfuran-2-yl)-3-methylcyclopentyl)ethanone	Others	Others	Others	0	834446	0
		Caryophyllene oxide	Sesquiterpenoids	Prenol lipids	Lipids and lipid-like molecules	0	3.40242e+06	0
		(3R,3aR,3bR,4S,7R,7aR)-4-Isopropyl-3,7-dimethyloctahydro-1H-cyclopenta[1,3]cyclopropa[1,2]benzen-3-ol	Others	Others	Others	690343	1.75604e+06	846974
		(3S,3aR,3bR,4S,7R,7aR)-4-Isopropyl-3,7-dimethyloctahydro-1H-cyclopenta[1,3]cyclopropa[1,2]benzen-3-ol	Others	Others	Others	690343	1.75604e+06	846974
		Naphthalene, 1,6-dimethyl-4-(1-methylethyl)-	Others	Others	Others	1.64776e+06	94946	1.43781e+06
		Agarospirol	Sesquiterpenoids	Prenol lipids	Lipids and lipid-like molecules	2.36367e+07	2.67857e+07	8.17287e+07
		2-Naphthalenemethanol, 1,2,3,4,4a,5,6,7-octahydro-.alpha.,.alpha.,4a,8-tetramethyl-, (2R-cis)-	Others	Others	Others	3.17468e+06	4.05237e+06	1.6847e+07
		2-((2R,8R,8aS)-8,8a-Dimethyl-1,2,3,4,6,7,8,8a-octahydronaphthalen-2-yl)propan-2-ol	Sesquiterpenoids	Prenol lipids	Lipids and lipid-like molecules	1.93454e+07	1.75108e+07	6.7827e+07

## Sheet: Table S10
Table S10. The ANOVA and multiple comparison analysis of main essential oil related metabolites among three tree age woods
DAMs	Subclass	Areas
		10a	30a	80a	F value
Ureidosuccinic_acid	Amino acids, peptides, and analogues	257149481.56±9630990.37b	775839775.91±65390471.47a	6296000.31±680434.24c	423***
L-2,4-diaminobutyric acid	Amino acids, peptides, and analogues	21514645.19±454228c	96534664.17±8682166.86b	113279579.5±12242582.79a	127.1***
N(6)-Methyllysine	Amino acids, peptides, and analogues	31555924.47±1214614.43b	192722304.21±17333122.93a	11083688.1±1197859.05c	391.5***
L-Homoserine	Amino acids, peptides, and analogues	1494598010.25±31554703.76b	258400860.24±23240142.83c	6960026837.8±752198279.37a	269***
(3S,5S)-3,5-Diaminohexanoate	Amino acids, peptides, and analogues	143483679.84±4484616.52a	150411527.06±6992527.32a	23469817.72±2536478.22b	810.3***
N-Alpha-acetyllysine	Amino acids, peptides, and analogues	137763391.81±5302630.38a	90677601.58±8155392.41b	3037685.93±328295.02c	592.1***
5-Aminopentanoic acid	Amino acids, peptides, and analogues	23182046016.83±868234540.34a	16580138724.38±1158923568.66b	7064254208.6±763462553.36c	294***
Leucine	Amino acids, peptides, and analogues	101460533.73±3799989.86b	148139263.57±9986617.27a	29964085.53±3238340.04c	341***
Cuminaldehyde	Monoterpenoids	58836996.8±1242196.23b	424550874.46±28620549.28a	2227113.05±240693.12c	768.4***
Carvone	Monoterpenoids	1425977309.41±56106002.6b	7206198329.24±489401409.06a	2977860.51±321829.44c	719.7***
Perillic acid	Monoterpenoids	50658004.15±1949869.76b	1119092497.19±94321003.24a	1773745.13±191695.82b	537.6***
Zerumbone	Sesquiterpenoids	97205580.93±2052253.05a	26341603.61±2473078.75c	64234533.88±6942086.14b	257.8***
Caryophyllene	Sesquiterpenoids	310436694.23±11626750.3c	411358757.61±27731219.74b	898892440.28±97146945.45a	114.9***
Selinene	Sesquiterpenoids	1541049128.96±57716738.3a	1371570043.23±92462624.12b	658902517.24±71210262.73c	155.1***
Capsidiol	Sesquiterpenoids	253998527.52±9512978.03b	284945223.14±19209214.48a	30104372.58±3253501.43c	493.7***
Caryophyllene alpha-oxide	Sesquiterpenoids	1984204635.18±74314191.15b	3739839240.14±252116435.9a	408014467.96±44095775.46c	469.3***
Abscisic acid	Sesquiterpenoids	115258918.77±3602444.9b	220495526.22±14864421.31a	4297039.64±464398.47c	599***
Naphthalene, 1,2,3,5,6,8a-hexahydro-4,7-dimethyl-1-(1-methylethyl)-, (1S-cis)-	Sesquiterpenoids	50726241.13±25212121.82a	4289320.53±8005882.18b	6266958.37±5980570.75b	11.25**
Azulene, 1,2,3,5,6,7,8,8a-octahydro-1,4-dimethyl-7-(1-methylethenyl)-, [1S-(1.alpha.,7.alpha.,8a.beta.)]-	Sesquiterpenoids	11615522.47±22081335.73	0±0	450269.54±213332.01	1.066
Guaiol	Sesquiterpenoids	42363484.74±63380381.31b	9145824.77±4972287.11b	125696888.71±53091952.44a	6.306*
8-Isopropyl-1,5-dimethyltricyclo[4.4.0.02,7]dec-4-en-3-one	Sesquiterpenoids	33371044.65±41226041.52	0±0	0±0	2.621
2-((2R,8R,8aS)-8,8a-Dimethyl-1,2,3,4,6,7,8,8a-octahydronaphthalen-2-yl)propan-2-ol	Sesquiterpenoids	42011344.46±61357382.44b	26735039.89±10975479.68b	111437690.72±46818367.9a	4.024*
5-Azulenemethanol, 1,2,3,4,5,6,7,8-octahydro-.alpha.,.alpha.,3,8-tetramethyl-, acetate, [3S-(3.alpha.,5.alpha.,8.alpha.)]-	Sesquiterpenoids	42011344.46±61357382.44	26735039.89±10975479.68	79819646.41±56794061.1	1.26
Note, *** means P<0.001, ** means P<0.01, * means P<0.05, the different letters indicates significant difference, and the same letter indicates no significant difference.

[truncated: 1 more sheets: Table S11]
